# Supplementary material for: Impact of a teaching hospital-based multidisciplinary telemedicine programme in Southwestern Colombia: a cross-sectional resource analysis
Source: PubMed Central journal article supplement — BMJ Open. 2024 May 1;14(5):e084447. doi: 10.1136/bmjopen-2024-084447 (PMC11086581; doi:10.1136/bmjopen-2024-084447), 2024-05-01
Supplement: bmjopen-2024-084447.draft_revisions.pdf [file bmjopen-2024-084447.draft_revisions.pdf]

# BMJ Open

BMJ Open is committed to open peer review. As part of this commitment we make the peer review history of every article we publish publicly available.

When an article is published we post the peer reviewers' comments and the authors' responses online. We also post the versions of the paper that were used during peer review. These are the versions that the peer review comments apply to.

The versions of the paper that follow are the versions that were submitted during the peer review process. They are not the versions of record or the final published versions. They should not be cited or distributed as the published version of this manuscript.

BMJ Open is an open access journal and the full, final, typeset and author-corrected version of record of the manuscript is available on our site with no access controls, subscription charges or pay-per-view fees (<http://bmjopen.bmj.com>).

If you have any questions on BMJ Open's open peer review process please email [info.bmjopen@bmj.com](mailto:info.bmjopen@bmj.com)

# BMJ Open

## Savings for patients in relation to an outpatient Telemedicine program in a hospital in southwestern Colombia.

|                               |                                                                                                                                                                                                                                                                                                                                                                                                                                                                                                                                                                                                   |
|-------------------------------|---------------------------------------------------------------------------------------------------------------------------------------------------------------------------------------------------------------------------------------------------------------------------------------------------------------------------------------------------------------------------------------------------------------------------------------------------------------------------------------------------------------------------------------------------------------------------------------------------|
| Journal:                      | <i>BMJ Open</i>                                                                                                                                                                                                                                                                                                                                                                                                                                                                                                                                                                                   |
| Manuscript ID                 | bmjopen-2024-084447                                                                                                                                                                                                                                                                                                                                                                                                                                                                                                                                                                               |
| Article Type:                 | Original research                                                                                                                                                                                                                                                                                                                                                                                                                                                                                                                                                                                 |
| Date Submitted by the Author: | 18-Jan-2024                                                                                                                                                                                                                                                                                                                                                                                                                                                                                                                                                                                       |
| Complete List of Authors:     | Prada, Sergio Iván; Fundacion Valle del Lili, Subdirección de Investigación e Innovación; Universidad Icesi, Centro PROESA<br>Toro, José Joaquín; Fundación Valle del Lili, Departamento de Costos y Presupuestos<br>Peña-Zárate, Evelyn E.; Fundación Valle del Lili Cali, Centro de investigaciones clínicas<br>Libreros-Peña, Laura; Fundación Valle del Lili Cali<br>Alarcón, Juliana; Fundación Valle del Lili Cali, Centro de investigaciones clínicas<br>Escobar, Maria; Fundacion Valle del Lili, Unidad de Equidad Global en Salud ; Universidad Icesi, Facultad de Ciencias de la Salud |
| Keywords:                     | Telemedicine < BIOTECHNOLOGY & BIOINFORMATICS, Latin America, HEALTH ECONOMICS                                                                                                                                                                                                                                                                                                                                                                                                                                                                                                                    |
|                               |                                                                                                                                                                                                                                                                                                                                                                                                                                                                                                                                                                                                   |

SCHOLARONE™  
Manuscripts

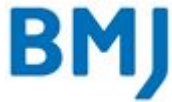

I, the Submitting Author has the right to grant and does grant on behalf of all authors of the Work (as defined in the below author licence), an exclusive licence and/or a non-exclusive licence for contributions from authors who are: i) UK Crown employees; ii) where BMJ has agreed a CC-BY licence shall apply, and/or iii) in accordance with the terms applicable for US Federal Government officers or employees acting as part of their official duties; on a worldwide, perpetual, irrevocable, royalty-free basis to BMJ Publishing Group Ltd ("BMJ") its licensees and where the relevant Journal is co-owned by BMJ to the co-owners of the Journal, to publish the Work in this journal and any other BMJ products and to exploit all rights, as set out in our [licence](#).

The Submitting Author accepts and understands that any supply made under these terms is made by BMJ to the Submitting Author unless you are acting as an employee on behalf of your employer or a postgraduate student of an affiliated institution which is paying any applicable article publishing charge ("APC") for Open Access articles. Where the Submitting Author wishes to make the Work available on an Open Access basis (and intends to pay the relevant APC), the terms of reuse of such Open Access shall be governed by a Creative Commons licence – details of these licences and which [Creative Commons](#) licence will apply to this Work are set out in our licence referred to above.

Other than as permitted in any relevant BMJ Author's Self Archiving Policies, I confirm this Work has not been accepted for publication elsewhere, is not being considered for publication elsewhere and does not duplicate material already published. I confirm all authors consent to publication of this Work and authorise the granting of this licence.

## Savings for patients in relation to an outpatient Telemedicine program in a hospital in southwestern Colombia.

Sergio Iván Prada<sup>1,2</sup>, José Joaquín Toro<sup>3</sup>, Evelyn E. Peña-Zárate<sup>4</sup>, Laura Libreros-Peña<sup>4</sup>,  
Juliana Alarcón<sup>4</sup>, Maria Fernanda Escobar<sup>5,6,7</sup>

1. Subdirección de Investigación e Innovación, Fundación Valle del Lili, Cali, Colombia
2. Centro PROESA, Universidad Icesi, Cali, Colombia.
3. Departamento de Costos y Presupuestos, Fundación Valle del Lili, Cra. 98 no. 18-49, Cali 760032, Colombia.
4. Centro de Investigaciones Clínicas, Fundación Valle del Lili, Cra. 98 no. 18-49, Cali 760032, Colombia.
5. Unidad de Equidad Global en Salud, Fundación Valle del Lili, Cra. 98 no. 18-49, Cali 760032, Colombia.
6. Departamento de Ginecología y Obstetricia, Fundación Valle del Lili, Cra. 98 no. 18-49, Cali 760032, Colombia.
7. Facultad de Ciencias de la Salud, Universidad Icesi, Cali, Colombia

### Corresponding author:

Maria Fernanda Escobar Vidarte MD, MsC

Fundación Valle del Lili. Cra 98 Nro.18-49 Cali 7600.2, Colombia

Phone: (57)(2)3319090 Extension 3025-3055 Fax: (57) 2 3319090

Email: [maria.escobar.vi@fvl.org.co](mailto:maria.escobar.vi@fvl.org.co) , [publicaciones@fvl.org.co](mailto:publicaciones@fvl.org.co)

**Abstract:**

**Background:** Telemedicine, a method of healthcare service delivery bridging geographic distances between patients and providers, has gained prominence. This modality is particularly advantageous for outpatient consultations, addressing inherent barriers of travel time and cost.

**Objective:** We aim to describe economical outcomes towards the implementation of a multidisciplinary telemedicine service in a high-complexity Hospital in Latin America, from the perspective of patients.

**Design:** A cross-sectional study was conducted, analyzing the institutional data obtained over a period of 9 months, between April 2020 and December 2020.

**Setting:** A high-complexity hospital located in Cali, Colombia.

**Participants:** Individuals who received care via telemedicine. The population was categorized into three groups based on their place of residence: Cali, Valle del Cauca, and the entire country of Colombia.

**Outcome measures:** Travel distance, time, fuel and public round-trip cost savings, and potential loss of productivity were estimated from the patient's perspective.

**Results:** A total of 62,258 teleconsultations were analyzed. Telemedicine led to a total distance savings of 4,514,903 kilometers, and 132,886 hours. The estimated cost savings were \$250,840 USD for private transportation and \$400,788 USD for public transportation. Patients in the Colombia group experienced an estimated average time savings of 21.23 hours, translating to an average fuel savings of \$54.90 USD or an average savings of \$57.70 USD in public transportation costs. Areas with exclusive air access achieved a mean cost savings of \$133.71 USD per teleconsultation.

**Conclusion:** Telemedicine emerges as a powerful tool for achieving substantial travel savings for patients, especially in regions confronting geographical and socioeconomic obstacles. These findings underscore the potential of telemedicine to bridge healthcare accessibility gaps in low-

1  
2  
3 and middle-income countries, calling for further investment and expansion of telemedicine  
4 services in such areas.  
5

6  
7 **Key Words:** Health economics, Telemedicine, Latin America.  
8  
9

### 10 11 **Strengths and limitations of this study**

- 12  
13 • Our study was based on institutional administrative data and carried out retrospectively.  
14  
15 This study solely focused on transportation savings and did not consider other potential  
16 costs, such as waiting time in the waiting room, food, lodging expenses, among others.  
17  
18 • Clinical outcomes were not included in our analysis. Nevertheless, the substantial sample  
19 size of this study and the inclusion of heterogenous areas provide both internal and  
20 external validation, allowing for the extrapolation of our results.  
21  
22 • Our study offers valuable insights into travel savings from the Colombian perspective; and  
23 contributes to filling the knowledge gap on this topic in Low- and Middle-Income countries.  
24  
25  
26  
27  
28  
29  
30  
31

### 32 33 **Introduction:**

34  
35 In the last decade, there have been significant technological advances in healthcare.  
36  
37 Telemedicine is a modality of healthcare services delivery, where patients and providers are  
38 separated by distance. Telehealth uses information and communication technology for the  
39 exchange of information, related to the diagnosis and treatment of diseases and injuries, and to  
40 strengthen research and continuing education of health professionals (1). This care model can be  
41 especially helpful for outpatient consultations, where barriers related to travel time and cost are  
42 constantly inherent for patients (2,3).  
43  
44

45  
46 Positive results regarding patient satisfaction and outcomes of telemedicine care have been  
47 reported in the literature (4). This tool has reduced costs in the health system of several countries  
48 (5,6). From the patient's perspective, despite its inherent limitations, telemedicine has been well-  
49 received and has generated excellent patient satisfaction (6,7). Telemedicine led savings for  
50  
51  
52  
53  
54  
55  
56  
57  
58  
59  
60

1  
2  
3 patients and their companions, mainly those related to care, including travel time, distance, and  
4 costs (8–10). However, most of the studies about patient savings related to telemedicine use had  
5 been conducted in high-income countries, providing information on the teleconsultation offered for  
6 a single state, locality, or city.  
7  
8  
9  
10

11 The development and enhancement of telemedicine in Colombia has been under discussion since  
12 2010. However, it wasn't until 2020, during the COVID-19 pandemic's public health emergency,  
13 that the government began to actively promote its utilization; this was driven by the enforcement  
14 of mandatory lockdown measures and the imperative to ensure continuous medical care. In this  
15 circumstance, the Fundación Valle del Lili (FVL), a highly complex Colombian university hospital,  
16 quickly introduced a telemedicine service. Implementing this service encountered significant  
17 challenges, the availability of resources and the cultural resistance exhibited by patients toward  
18 this modality of attention (11). Our aim was to estimate the hypothetical transportation-related  
19 savings in time, distance, and costs assumed for the patient due to outpatient care by the FVL  
20 telemedicine program during April to December 2020.  
21  
22  
23  
24  
25  
26  
27  
28  
29  
30  
31  
32  
33  
34

## 35 **Methods:**

### 36 **Design and population:**

37 A retrospective study focused on the time and transportation cost savings experienced by the  
38 patients as a result of telemedicine interventions. Our study included patient who resided in  
39 Colombia and received outpatient teleconsultation through the FVL Telemedicine program  
40 between April and December 2020. We excluded patients residing in countries other than  
41 Colombia, as well as those lacking residence information or address details. The study population  
42 was categorized based on their place of residence into the following three groups:  
43  
44  
45  
46  
47  
48  
49  
50

- 51 - Cali: People who live in the city of Cali, Valle del Cauca.
- 52
- 53 - Valle del Cauca: people who live in other cities in Valle del Cauca, different to Cali.
- 54
- 55 - Colombia: people who live in other departments, different to Valle del Cauca.
- 56  
57  
58  
59  
60

1  
2  
3 A sample size calculation was performed for the population of Cali, which consisted of 814  
4 individuals selected through simple random sampling. This resulted in a total of 1,708  
5 teleconsultations in the selected sample, representing 3.9% of the 44,182 teleconsultations  
6 conducted in this group. As a result, calculations for the total savings in this group were carried  
7 out by multiplying the value obtained in the sample by 25.87.  
8  
9  
10  
11  
12

13 Factor de expansion.  
14  
15  
16  
17

### 18 **Overview of the Fundación Valle del Lili Telemedicine Program:**

19  
20 FVL is a private, non-profit, high-complexity hospital located in Santiago de Cali. Serving as a  
21 referral center in the southwest region of Colombia, the institution provides across various health  
22 specialties to around 12,700 patients annually. FVL has a telemedicine service, which was  
23 promoted and strengthened in March 2020 to ensure the continuity of ambulatory health services,  
24 in view of the declaration of health emergency by COVID-19 by the Ministry of Health, throughout  
25 the Colombian territory.  
26  
27  
28  
29  
30  
31

32 FVL's telemedicine service facilitates outpatient care across 64 medical specialties, employing an  
33 interactive modality that establishes remote communication between patients and healthcare  
34 professionals through real-time video calls, facilitated by the Microsoft Teams platform. The care  
35 information was recorded in the SAP electronic medical record system. Upon the conclusion of  
36 the teleconsultation, a Portable Document File (PDF) containing the medical record, orders, and  
37 prescriptions was sent directly to the patient's designated email address.  
38  
39  
40  
41  
42  
43  
44

### 45 **Outcome measures:**

46  
47 The following outcome measures were taken into consideration:  
48

- 49 a) Travel distance savings: The distance in kilometer of round-trip that the patient would  
50 have traveled for an in-person consultation at the FVL.  
51  
52  
53  
54  
55  
56  
57  
58  
59  
60



- 1  
2  
3 b) Travel time savings: The time in hours of round-trip that the patient would have wasted  
4 for an in-person consultation at the FVL; it represents the patient work time loss due to  
5 the travel for an in-person consultation.  
6  
7  
8  
9 c) Travel cost savings: The expenses related to round-trip that the patient would have  
10 spent for an in-person consultation at the FVL. For all cases, two modes of  
11 transportation were considered: 1) private transportation, for which round-trip fuel  
12 expenses were calculated for; and 2) public transportation, for which taxi costs (Cali  
13 group) or intermunicipal bus costs (Valle del Cauca and Colombia groups) were  
14 calculated based on 2020 fare rates.  
15  
16  
17  
18  
19  
20  
21  
22 d) Potential loss of productivity: It pertains to the value of work time that the patient would  
23 have lost due to the round-trip travel required if they had made the consultation in-  
24 person.  
25  
26  
27

28 **Distance and time calculation:** Measurements of car transportation were performed using  
29 Google Maps, taking the main FVL center as the destination and the patient's place of residence  
30 as the origin. The patient's home address was defined by the address (for Cali residents) or the  
31 registered municipality of residence in the electronic medical record system. The car transport  
32 option and the quickest route were selected. The estimated distance and travel time were doubled  
33 to encompass the round-trip travel to and from the FVL.  
34  
35  
36  
37  
38  
39  
40

41 **Fuel cost calculation:** We took as a reference the cost per gallon of fuel reported by the Ministry  
42 of Mines and Energy for the year 2020 that was \$8,268 COP (\$2,24 USD); and an average  
43 consumption of 40 km traveled per gallon.  
44  
45  
46

$$47 \text{Fuel cost saved} = \frac{\text{Round trip distance (km)}}{40 \text{ (km)}} * \$ 8,268$$

48  
49  
50  
51 **Calculation of public transportation cost savings:** To calculate the cost public transportation  
52 for the population living in Cali, we considered the cab fare reported by the Cali Municipal Hall for  
53 the year 2020, which was \$84 COP for each 80 meters traveled. For residents in other areas of  
54  
55  
56  
57  
58  
59  
60

1  
2  
3 Valle del Cauca and Colombia, we searched on the virtual platforms of the country's public  
4 transportation terminals to determine the fare cost of inter-municipal bus travel from the different  
5 localities to the city of Cali.  
6  
7

8  
9 It should be highlighted that for the municipalities where river transportation is necessary, the  
10 travel cost and time required for each municipality were consulted, in addition to the cost and time  
11 of land transportation. For the municipalities that do not have land access, estimates were made  
12 of the airfare costs, these were excluded in the calculations of distance and time savings.  
13

14  
15 **Calculation of the potential loss of productivity:** In Colombia the legal minimum wage in force  
16 for the year 2020 was \$877,803 COP (\$235,90 USD), the workday corresponds to 48 hours per  
17 week, which is adjusted to 8 hours per day. The value of 1 hour worked was \$ 3,657 COP (\$0,98  
18 USD). With the above, the value that the patient would have lost due to lost work time secondary  
19 to the round-trip to attend an in-person consultation was calculated.  
20  
21  
22  
23  
24  
25  
26  
27

$$\text{Work cost of time saved} = \text{Round trip time (hour)} * \$ 3,657 \text{ COP}$$

28  
29 All costs were calculated in Colombian Pesos and subsequently converted to US Dollars  
30 according to the average market exchange rate (TRM, by its Spanish acronym) for the year 2020,  
31 which was \$3,721 COP (12).  
32  
33  
34  
35  
36  
37  
38

### 39 **Ethics Approval**

40  
41 This study was conducted according to the Declaration of Helsinki guidelines; and was classified  
42 as a risk-free study according to resolution No. 008430 of 1993, article 11, numeral A of the  
43 Ministry of Health and Social Protection of Colombia. The institutional ethics committee reviewed  
44 and approved the protocol (Protocol No. 1742; IRB/EC No. 090 – 2021, Act No. 06 - 2021). This  
45 study did not require intervention or intentional modification of the biological, physiological,  
46 psychological, or social variables of the participants. Therefore, no informed consent was  
47 necessary.  
48  
49  
50  
51  
52  
53  
54  
55  
56  
57  
58  
59  
60

## Results

A total of 296,170 outpatient care consultations were made from April to December 2020. Among these, 152 consultations were excluded due to patients residing outside of Colombia. Consequently, 296,018 consultations were included, out of which 62,258 (21.03%) were conducted via telemedicine, involving 27,948 individuals (**Table 1**). The median age of the population was 41 years (IQR 21-61), the majority were female (62.95%), and the median of teleconsultations per person were 1 (IQR 1-2) (**Table 2**). Telemedicine services were primarily provided by Psychiatry (8891, 14.28%), Endocrinology (6088, 9.78%), and Psychology (4603, 7.39%).

**Table 1.** Number of outpatient care provided per month according to modality of care, between April and December 2020.

| Month        | Telemedicine consultations | In-person consultations |
|--------------|----------------------------|-------------------------|
| April        | 4181                       | 8920                    |
| May          | 7378                       | 13674                   |
| June         | 7770                       | 20576                   |
| July         | 9427                       | 25897                   |
| August       | 8117                       | 24679                   |
| September    | 7707                       | 33305                   |
| October      | 6521                       | 36153                   |
| November     | 5609                       | 36094                   |
| December     | 5548                       | 34462                   |
| <b>Total</b> | <b>62258</b>               | <b>233760</b>           |

**Table 2.** Sociodemographic characteristics of the patients attended via telemedicine, between April and December 2020.

| Variable                                              | No. of patients, n (%) |
|-------------------------------------------------------|------------------------|
| Age, median (IQR)                                     | 41 (21 - 61)           |
| Sex                                                   |                        |
| Female                                                | 17594 (62.95)          |
| Male                                                  | 10354 (37.05)          |
| Number of teleconsultations per patient, median (IQR) |                        |
| 1 – 5                                                 | 26246 (93.91)          |
| 6 – 10                                                | 1078 (3.86)            |
| 11 – 20                                               | 455 (1.63)             |
| > 20                                                  | 169 (0.60)             |

Total travel savings in terms of distance amounted to 4,514,903 kilometers, and in terms of time, it reached 132,886 hours. The estimated travel cost savings were \$381,451 USD for private transportation (combining fuel cost savings and potential productivity gains) and \$531,399 USD for public transportation (cost of public transportation saved and potential productivity gains). The largest savings were in the rest of Colombia group, which are those people living in departments of Colombia other than Valle del Cauca. Table 3 shows the total and average savings per teleconsultation for each group. Furthermore, it was estimated that individuals residing in areas where access can only be achieved by air, a savings of \$134 USD (SD 131.17) per teleconsultation (Table 3).

**Table 3.** Distance, time, fuel, and public transportation savings observed by telemedicine consultation, between April and December 2020.

| Variable                                                | Total<br>n=62,258     | Cali<br>n=44,182      | Valle del Cauca<br>n=12,707 | Rest of<br>Colombia<br>n=5,369 |
|---------------------------------------------------------|-----------------------|-----------------------|-----------------------------|--------------------------------|
| Number of patients<br>attended by telemedicine          | 27,948                | 19,630                | 5,703                       | 2,605                          |
| <b>Round-trip distance saved (km)</b>                   |                       |                       |                             |                                |
| Total                                                   | 4,514,903             | 644,758               | 1,295,538                   | 2,574,607                      |
| Mean (SD)                                               | 72.55 (190)           | 14.60 (9.44)          | 101.95 (82.88)              | 481.15 (454.02)                |
| Median (IQR)                                            | 20.80(8.6 -33.4)      | 11.60 (6 - 23.6)      | 76.40 (30.40 -<br>149)      | 328 (258 - 750)                |
| <b>Round-trip time saved (hours)</b>                    |                       |                       |                             |                                |
| Total                                                   | 132,886               | 43,461                | 34,127                      | 55,298                         |
| Mean (SD)                                               | 1.80 (7.02)           | 0.98 (0.35)           | 2.69 (1.43)                 | 10.33 (22.11)                  |
| Median (IQR)                                            | 0.93 (0.43 –<br>1.27) | 0.90 (0.67 -<br>1.27) | 2.40 (1.33 - 3.17)          | 6.73 (5.63 -<br>17.0)          |
| <b>Potential loss of productivity (USD)</b>             |                       |                       |                             |                                |
| Total                                                   | 130,611               | 42,711                | 33,545                      | 54,355                         |
| Mean (SD)                                               | 2.10 (6.90)           | 0.97 (0.34)           | 2.64 (1.41)                 | 10.16 (21.73)                  |
| Median (IQR)                                            | 1.25 (0.75 –<br>1.57) | 0.88 (0.66 -<br>1.25) | 2.4 (1.3 - 3.1)             | 6.62 (5.54 -<br>16.71)         |
| <b>Total fuel cost saved (USD)</b>                      |                       |                       |                             |                                |
| Total                                                   | 250,840               | 35,855                | 71967                       | 143,018                        |
| Mean (SD)                                               | 4.03 (10.55)          | 0.81 (0.52)           | 5.66 (4.60)                 | 26.73 (25.22)                  |
| Median (IQR)                                            | 1.16 (0.48 -<br>1.86) | 0.64 (0.33 -<br>1.31) | 4.24 (1.69 - 8.28)          | 18.22 (14,33 -<br>41.66)       |
| <b>Total cost of public transportation saved* (USD)</b> |                       |                       |                             |                                |
| Total                                                   | 400,788               | 182,098               | 68,373                      | 150,317                        |
| Mean (SD)                                               | 6.44 (10.94)          | 4.12 (2.66)           | 5.38 (5.09)                 | 28.09 (27.49)                  |

|              |                    |                    |                    |                       |
|--------------|--------------------|--------------------|--------------------|-----------------------|
| Median (IQR) | 3.27 (2.15 – 7.28) | 3.27 (1.69 - 6.66) | 2.69 (2.15 - 7.79) | 16.12 (15.05 - 40.31) |
|--------------|--------------------|--------------------|--------------------|-----------------------|

---

**Saved transportation costs for municipalities with exclusively air income (USD) \***

|              |    |    |    |                        |
|--------------|----|----|----|------------------------|
| Total        | NA | NA | NA | 2,273                  |
| Mean (SD)    | NA | NA | NA | 133.71 (59.75)         |
| Median (IQR) | NA | NA | NA | 97.82 (97.82 - 182.75) |

---

\* Refers to teleconsultations from people living in areas with no land access: Guapi (Cauca), Timbiquí (Cauca), Leticia (Amazonas), San Andres (San Andres y Providencia).

NA: Not apply.

The mean number of teleconsultations per patient was 2.10 (SD2.54) in Cali, 2.23 (SD 3.14) in Valle del Cauca, and 2.05 (SD 2.28) for the Colombia group. The estimated mean cost savings for private transportation round-trip per patient was \$3.73 USD in Cali, \$18.5 USD in Valle del Cauca, and \$75.77 USD in Colombia; and mean cost savings for public transportation expenses per patient was \$10.68 USD in Cali, \$17.87 USD in Valle del Cauca, and \$78.57 USD in Colombia. In addition, the transportation cost savings for individuals residing in areas with exclusive air access amounted to \$252.56 USD, with a standard deviation of \$144.60. (**Table 4**).

**Table 4.** Distance, time, fuel, and public transportation per patient (all visits), between April and December 2020.

|                 | <b>Cali</b> | <b>Valle del Cauca</b> | <b>Colombia</b> |
|-----------------|-------------|------------------------|-----------------|
| <b>Variable</b> | N=19,630    | N=5,703                | N=2,615         |
|                 | n= 814      |                        |                 |

|                                                                                                   |               |                 |                  |
|---------------------------------------------------------------------------------------------------|---------------|-----------------|------------------|
| Teleconsultations per patient,<br>mean (SD)                                                       | 2.10 (2.54)   | 2.23 (3.14)     | 2.05 (2.28)      |
| Distance saved per patient (km),<br>mean (SD)                                                     | 30.64 (52.80) | 227.17 (398.38) | 988.33 (1556.41) |
| Time saved per patients (hours),<br>mean (SD)                                                     | 2.06 (2.90)   | 5.98 (9.26)     | 21.23 (51.47)    |
| Potential loss of productivity<br>(USD), mean (SD)                                                | 2.03 (2.86)   | 5.88 (9.10)     | 20.87 (50.59)    |
| Fuel cost saved per patient<br>(USD), mean (SD)                                                   | 1.70 (2.93)   | 12.62 (22.13)   | 54.90 (86.46)    |
| Cost of public transportation<br>saved* (USD), mean (SD)                                          | 8.65 (14.90)  | 11.99 (23.86)   | 57.70 (92.49)    |
| Saved transportation costs for<br>municipalities with exclusively air<br>income (USD)*, mean (SD) | NA            | NA              | 252.56 (144.60)  |

\* Refers to teleconsultations from people living in areas with no land access: Guapi (Cauca), Timbiquí (Cauca), Leticia (Amazonas), San Andres (San Andres y Providencia).

NA: Not apply.

## Discussion:

The present study estimated travel savings in time, distance, and out-of-pocket expenses resulting from outpatient telemedicine care, evidencing a benefit of the use of telemedicine in its teleconsultation modality for patients in a middle-income country (MIC). In April 2020, Fundación Valle del Lili, as a leading institution and reference center aligned with a social agenda towards achieving the Sustainable Development Goals (SDG), implemented an emergent telemedicine service to address the health needs of patients during the pandemic.

1  
2  
3  
4  
5 Over an eight-month period, 62,258 teleconsultations were conducted for 27,948 patients residing  
6 in Colombia. The population was divided into three categories based on their residence: Cali, Valle  
7 del Cauca, and the rest of Colombia. The last group had the greatest savings per patient, with an  
8 average distance saved of 481.15 km per teleconsultation; 10.33 hours per teleconsultation, which  
9 corresponds to an average saving of 26.73 USD in fuel or 28.09 USD in public transportation.  
10 Taking into consideration the aforementioned data and an average of 2.05 teleconsultations per  
11 patient, the average savings per person were as follows: 988.33 km in distance, 21.23 hours in  
12 time, \$20.87 in Potential loss of productivity, \$54.90 in private transportation, and \$57.70 in public  
13 transportation.  
14  
15  
16  
17  
18  
19  
20  
21  
22  
23  
24  
25

26 In LMIC, the population at the base of the socioeconomic pyramid bears a disproportionately high  
27 of disease, often facing limited access to health services due to lower purchasing power and  
28 residence in underserved areas. In such contexts, there is an urgent need to identify innovative  
29 short-, medium-, and long-term to achieve effective universal health coverage, giving special  
30 strength to programs that allow access in the most remote and vulnerable areas (13,14).  
31 Telehealth systems strengthening has the potential to improve health and socioeconomic status  
32 of different population groups. Extending healthcare services to these remote areas through  
33 telemedicine helps bridge this gap and facilitates substantial reductions in both time and distance  
34 (15–18). In Colombia, 7.2% of the population lives in rural areas (19), with significant challenges  
35 and obstacles when accessing healthcare services, particularly specialized medical care (14).  
36  
37  
38  
39  
40  
41  
42  
43  
44  
45  
46  
47  
48

49 In 2020, as the COVID-19 pandemic spread worldwide, world poverty increased, and poverty  
50 induced by COVID-19 (20). Colombia was significantly affected by this issue, with a noticeable  
51 deterioration in its economic growth indicators. In 2020, the pandemic led to a 6.8% decline in  
52 Colombia's economy (Gross Domestic Product (GDP)), contributing to an increase in the national  
53  
54  
55  
56  
57



1  
2  
3 unemployment rate by at least 8 percentage points, resulting in an average rate of 15.9, a 5.4  
4 percentage points rise from the previous year (21,22). Furthermore, the proportion of informal  
5 employment increased from 45% to 49% (23). Thus, savings achieved by the program were very  
6 timely in the midst of the worst economic year in Colombian history. The introduction of  
7 telemedicine led to average Potential loss of productivity savings of \$2.03 and \$5.88 USD per  
8 patient for the population of Cali and Valle del Cauca, equivalent to 26% and 75% of a full day's  
9 salary, respectively. For the population of Colombia, \$20.87 USD was saved per patient,  
10 representing 9% of the minimum monthly salary.  
11  
12  
13  
14  
15  
16  
17  
18  
19  
20  
21

22 Transportation cost is a determining factor in access to health care, especially for those living in  
23 rural areas not having a tertiary or complex center nearby that can provide services by medical  
24 specialties (24). However, the need for more training in the use of technologies and the difficulties  
25 in acquiring technology that allows remote connection limits the implementation of telemedicine in  
26 these areas (6,25). In our study, the telemedicine program succeeded in extending its reach to  
27 remote locations facing geographical challenges. These areas are accessible solely by air or sea.  
28 Examples include municipalities such as Guapi, Timbiquí, Leticia, and San Andres island.  
29 Enhancing telecommunication networks in these regions could yield substantial savings in time,  
30 distance, and travel expenses for their residents (26). For people living in those municipalities  
31 savings in transportation costs estimated per patient exceeded the 2020 monthly minimum wage.  
32 Significant savings related to transportation and fuel expenses have been reported. These costs  
33 vary widely; studies have reported savings ranging from \$4.66 to \$150 per teleconsultation (4,27).  
34 Other studies have reported saved costs that encompass fuel expenses, insurance, and  
35 maintenance, resulting in higher per-person savings. Few studies have addressed costs related  
36 to public transportation; given the importance of public transportation in Colombia, especially  
37 between and within cities, this variable was key for a more realistic measurement (28). When  
38 comparing the average public transportation expenses saved for the Cali, Valle del Cauca, and  
39  
40  
41  
42  
43  
44  
45  
46  
47  
48  
49  
50  
51  
52  
53  
54  
55  
56  
57  
58  
59  
60

1  
2  
3 rest of Colombia locations to the legal monthly minimum salary in Colombia for year 2020, it  
4 represents 3.67%, 5.08%, and 24.19%, respectively for the average patient.  
5  
6  
7  
8  
9  
10

### 11 **Future implications**

12  
13 The results encourage developing public policies and strengthening strategies incorporating digital  
14 health and telemedicine in Latin America's countries. Our experience shows results aimed at  
15 reducing indirect patient costs related to providing health services and facilitating care by multiple  
16 specialties through teleconsultation.  
17  
18  
19  
20  
21  
22  
23

### 24 **Conclusion:**

25  
26 Telemedicine brings to patients a significant travel savings, both in terms of time, distance, cost  
27 and potential loss of productivity; particularly in regions facing geographical and socioeconomic  
28 challenges. These findings emphasize the potential of telemedicine to bridge healthcare  
29 accessibility gaps in middle-income countries and the need to further develop and expand  
30 telemedicine services in such areas.  
31  
32  
33  
34  
35  
36

### 37 **Funding**

38  
39 This research received no specific grant from any funding agency in the public, commercial or not-  
40 for-profit sectors.  
41  
42  
43  
44

### 45 **Conflicts of Interest**

46  
47 The authors report there are no competing interests to declare.  
48  
49  
50

### 51 **Data availability statement**

52  
53 The data that support the findings of this study are available from the corresponding author [MFE],  
54 upon reasonable request.  
55  
56  
57  
58  
59  
60

## Acknowledgements

We thank to the Fundación Valle del Lili, especially department of cost and budget for providing and supporting this current research.

## Author contributions

SIP and MFE designed and supervised the study; JJT and JA contributed to data collection; SIP, JJT, EEP and LLP contributed data analysis; SIP, MFE, EEP, LLP and JA contributed to literature review; EEP, LLP, JA, SIP and MFE contributed to drafted the manuscript. All authors read drafts of the manuscript and approved the final version

## References:

1. World Health Organization, International Telecommunication Union. WHO-ITU global standard for accessibility of telehealth services. En Geneva; 2022 [citado 28 de abril de 2023]. Disponible en: <https://www.who.int/publications-detail-redirect/9789240050464>
2. Bynum AB, Irwin CA, Cranford CO, Denny GS. The impact of telemedicine on patients' cost savings: some preliminary findings. *Telemed J E Health*. 2003;9(4):361-7.
3. Spaulding R, Belz N, DeLurgio S, Williams AR. Cost savings of telemedicine utilization for child psychiatry in a rural Kansas community. *Telemed J E Health*. octubre de 2010;16(8):867-71.
4. Dullet NW, Geraghty EM, Kaufman T, Kissee JL, King J, Dharmar M, et al. Impact of a University-Based Outpatient Telemedicine Program on Time Savings, Travel Costs, and Environmental Pollutants. *Value Health*. abril de 2017;20(4):542-6.
5. Snoswell CL, Taylor ML, Comans TA, Smith AC, Gray LC, Caffery LJ. Determining if Telehealth Can Reduce Health System Costs: Scoping Review. *J Med Internet Res*. 19 de octubre de 2020;22(10):e17298.

- 1  
2  
3 6. Almathami HKY, Win KT, Vlahu-Gjorgievska E. Barriers and Facilitators That Influence  
4  
5 Telemedicine-Based, Real-Time, Online Consultation at Patients' Homes: Systematic  
6  
7 Literature Review. *J Med Internet Res*. 20 de febrero de 2020;22(2):e16407.  
8
- 9 7. Eze ND, Mateus C, Hashiguchi TCO. Telemedicine in the OECD: An umbrella review of  
10  
11 clinical and cost-effectiveness, patient experience and implementation. *PLOS ONE*. 13 de  
12  
13 agosto de 2020;15(8):e0237585.  
14
- 15 8. Hussaini SMQ, Gupta A, Dusetzina SB. Financial Toxicity of Cancer Treatment. *JAMA*  
16  
17 *Oncology*. 1 de mayo de 2022;8(5):788.  
18
- 19 9. Tuckson RV, Edmunds M, Hodgkins ML. Telehealth. *N Engl J Med*. 19 de octubre de  
20  
21 2017;377(16):1585-92.  
22  
23
- 24 10. Patel KB, Turner K, Alishahi Tabriz A, Gonzalez BD, Oswald LB, Nguyen OT, et al. Estimated  
25  
26 Indirect Cost Savings of Using Telehealth Among Nonelderly Patients With Cancer. *JAMA*  
27  
28 *Network Open*. 10 de enero de 2023;6(1):e2250211.  
29
- 30 11. Luis Mauricio Figueroa. Telehealth in Colombia, challenges associated with COVID-19. 12 de  
31  
32 noviembre de 2020;40(2):77-9.  
33
- 34 12. Superintendencia Financiera de Colombia [Internet]. [citado 1 de septiembre de 2023].  
35  
36 Histórico TRM para estados financieros. Disponible en:  
37  
38 <https://www.superfinanciera.gov.co/jsp/index.jsf>  
39  
40
- 41 13. Departamento Administrativo Nacional de Estadística (DANE). Situación de las mujeres  
42  
43 rurales desde las estadísticas oficiales [Internet]. 2022 [citado 1 de septiembre de 2023].  
44  
45 Disponible en: [https://www.dane.gov.co/files/investigaciones/notas-estadisticas/oct-2022-](https://www.dane.gov.co/files/investigaciones/notas-estadisticas/oct-2022-nota-estadistica-mujer-rural-presentacion.pdf)  
46  
47 [nota-estadistica-mujer-rural-presentacion.pdf](https://www.dane.gov.co/files/investigaciones/notas-estadisticas/oct-2022-nota-estadistica-mujer-rural-presentacion.pdf)  
48
- 49 14. Brundisini F, Giacomini M, DeJean D, Vanstone M, Winsor S, Smith A. Chronic disease  
50  
51 patients' experiences with accessing health care in rural and remote areas: a systematic  
52  
53 review and qualitative meta-synthesis. *Ont Health Technol Assess Ser*. 2013;13(15):1-33.  
54  
55  
56  
57  
58  
59  
60

15. Speyer R, Denman D, Wilkes-Gillan S, Chen YW, Bogaardt H, Kim JH, et al. Effects of telehealth by allied health professionals and nurses in rural and remote areas: A systematic review and meta-analysis. *Journal of Rehabilitation Medicine*. 2018;50(3):225-35.
16. Carroll M, Cullen T, Ferguson S, Hogge N, Horton M, Kokesh J. Innovation in Indian Healthcare: Using Health Information Technology to Achieve Health Equity for American Indian and Alaska Native Populations. *Perspect Health Inf Manag*. 1 de enero de 2011;8(Winter):1d.
17. Lagomarsino G, Garabrant A, Adyas A, Muga R, Otoo N. Moving towards universal health coverage: health insurance reforms in nine developing countries in Africa and Asia. *Lancet*. 8 de septiembre de 2012;380(9845):933-43.
18. Balabanova D, Mills A, Conteh L, Akkazieva B, Banteyerga H, Dash U, et al. Good Health at Low Cost 25 years on: lessons for the future of health systems strengthening. *Lancet*. 15 de junio de 2013;381(9883):2118-33.
19. Dirección de Epidemiología y Demografía. Análisis de Situación de Salud (ASIS) Colombia, 2020. Ministerio de Salud y Protección Social; 2020.
20. Moyer JD, Verhagen W, Mapes B, Bohl DK, Xiong Y, Yang V, et al. How many people is the COVID-19 pandemic pushing into poverty? A long-term forecast to 2050 with alternative scenarios. *PLoS One*. 8 de julio de 2022;17(7):e0270846.
21. Departamento Administrativo Nacional de Estadística (DANE). Comunicado de prensa Producto Interno Bruto (PIB) IV trimestre y año 2020. Bogotá D.C; 2021 feb p. 1-10.
22. Departamento Administrativo Nacional de Estadística (DANE). Boletín Técnico Gran Encuesta Integrada de Hogares (GEIH) Diciembre 2020 [Internet]. Bogotá D.C; 2021 ene [citado 1 de septiembre de 2023] p. 1-36. Disponible en: [https://www.dane.gov.co/files/investigaciones/boletines/ech/ech/bol\\_empleo\\_dic\\_20.pdf](https://www.dane.gov.co/files/investigaciones/boletines/ech/ech/bol_empleo_dic_20.pdf)
23. Departamento Administrativo Nacional de Estadísticas - DANE [Internet]. [citado 1 de septiembre de 2023]. Empleo informal y seguridad social. Disponible en:

1  
2  
3 [https://www.dane.gov.co/index.php/estadisticas-por-tema/salud/informalidad-y-seguridad-](https://www.dane.gov.co/index.php/estadisticas-por-tema/salud/informalidad-y-seguridad-social/empleo-informal-y-seguridad-social-historicos)  
4 [social/empleo-informal-y-seguridad-social-historicos](https://www.dane.gov.co/index.php/estadisticas-por-tema/salud/informalidad-y-seguridad-social/empleo-informal-y-seguridad-social-historicos)  
5  
6

- 7 24. Wolfe MK, McDonald NC, Holmes GM. Transportation Barriers to Health Care in the United  
8 States: Findings From the National Health Interview Survey, 1997-2017. *Am J Public Health.*  
9 junio de 2020;110(6):815-22.  
10  
11  
12  
13 25. Zachrison KS, Boggs KM, Hayden EM, Espinola JA, Camargo CA. Understanding Barriers to  
14 Telemedicine Implementation in Rural Emergency Departments. *Ann Emerg Med.* marzo de  
15 2020;75(3):392-9.  
16  
17  
18  
19 26. Atmojo JT, Widiyanto A, Ernawati E, Arradini D, Tri Sudaryanto, Wahyu. Telemedicine, Cost  
20 Effectiveness, and Patients Satisfaction: A Systematic Review. *J HEALTH POLICY MANAGE.*  
21 2020;5(2):103-7.  
22  
23  
24  
25 27. Paquette S, Lin JC. Outpatient Telemedicine Program in Vascular Surgery Reduces Patient  
26 Travel Time, Cost, and Environmental Pollutant Emissions. *Ann Vasc Surg.* agosto de  
27 2019;59:167-72.  
28  
29  
30  
31 28. Ministerio de Transporte. Transporte en Cifras 2021. Anuario Nacional de Transporte. 12.<sup>a</sup>  
32 ed. 2022;55-8.  
33  
34  
35  
36  
37  
38  
39  
40  
41  
42  
43  
44  
45  
46  
47  
48  
49  
50  
51  
52  
53  
54  
55  
56  
57  
58  
59  
60

STROBE Statement—Checklist of items that should be included in reports of *cross-sectional studies*

|                              | Item No | Recommendation                                                                                                                                                                                               | Page No |
|------------------------------|---------|--------------------------------------------------------------------------------------------------------------------------------------------------------------------------------------------------------------|---------|
| <b>Title and abstract</b>    | 1       | (a) Indicate the study's design with a commonly used term in the title or the abstract                                                                                                                       | 1       |
|                              |         | (b) Provide in the abstract an informative and balanced summary of what was done and what was found                                                                                                          | 2-3     |
| <b>Introduction</b>          |         |                                                                                                                                                                                                              |         |
| Background/rationale         | 2       | Explain the scientific background and rationale for the investigation being reported                                                                                                                         | 3-4     |
| Objectives                   | 3       | State specific objectives, including any prespecified hypotheses                                                                                                                                             | 4       |
| <b>Methods</b>               |         |                                                                                                                                                                                                              |         |
| Study design                 | 4       | Present key elements of study design early in the paper                                                                                                                                                      | 4-5     |
| Setting                      | 5       | Describe the setting, locations, and relevant dates, including periods of recruitment, exposure, follow-up, and data collection                                                                              | 4-5     |
| Participants                 | 6       | (a) Give the eligibility criteria, and the sources and methods of selection of participants                                                                                                                  | 4-5     |
| Variables                    | 7       | Clearly define all outcomes, exposures, predictors, potential confounders, and effect modifiers. Give diagnostic criteria, if applicable                                                                     | 5-6     |
| Data sources/<br>measurement | 8*      | For each variable of interest, give sources of data and details of methods of assessment (measurement). Describe comparability of assessment methods if there is more than one group                         | 6-7     |
| Bias                         | 9       | Describe any efforts to address potential sources of bias                                                                                                                                                    | 6-7     |
| Study size                   | 10      | Explain how the study size was arrived at                                                                                                                                                                    | 4-5     |
| Quantitative variables       | 11      | Explain how quantitative variables were handled in the analyses. If applicable, describe which groupings were chosen and why                                                                                 | 6-7     |
| Statistical methods          | 12      | (a) Describe all statistical methods, including those used to control for confounding                                                                                                                        | 5-7     |
|                              |         | (b) Describe any methods used to examine subgroups and interactions                                                                                                                                          | 4-7     |
|                              |         | (c) Explain how missing data were addressed                                                                                                                                                                  | NA      |
|                              |         | (d) If applicable, describe analytical methods taking account of sampling strategy                                                                                                                           | 4-5     |
|                              |         | (e) Describe any sensitivity analyses                                                                                                                                                                        | NA      |
| <b>Results</b>               |         |                                                                                                                                                                                                              |         |
| Participants                 | 13*     | (a) Report numbers of individuals at each stage of study—eg numbers potentially eligible, examined for eligibility, confirmed eligible, included in the study, completing follow-up, and analysed            | 8-12    |
|                              |         | (b) Give reasons for non-participation at each stage                                                                                                                                                         | NA      |
|                              |         | (c) Consider use of a flow diagram                                                                                                                                                                           | NA      |
| Descriptive data             | 14*     | (a) Give characteristics of study participants (eg demographic, clinical, social) and information on exposures and potential confounders                                                                     | 8-12    |
|                              |         | (b) Indicate number of participants with missing data for each variable of interest                                                                                                                          | NA      |
| Outcome data                 | 15*     | Report numbers of outcome events or summary measures                                                                                                                                                         | 8-12    |
| Main results                 | 16      | (a) Give unadjusted estimates and, if applicable, confounder-adjusted estimates and their precision (eg, 95% confidence interval). Make clear which confounders were adjusted for and why they were included | 8-12    |

|                          |    |                                                                                                                                                                            |       |
|--------------------------|----|----------------------------------------------------------------------------------------------------------------------------------------------------------------------------|-------|
|                          |    | (b) Report category boundaries when continuous variables were categorized                                                                                                  | 8-12  |
|                          |    | (c) If relevant, consider translating estimates of relative risk into absolute risk for a meaningful time period                                                           | NA    |
| Other analyses           | 17 | Report other analyses done—eg analyses of subgroups and interactions, and sensitivity analyses                                                                             | 8-12  |
| <b>Discussion</b>        |    |                                                                                                                                                                            |       |
| Key results              | 18 | Summarise key results with reference to study objectives                                                                                                                   | 12-14 |
| Limitations              | 19 | Discuss limitations of the study, taking into account sources of potential bias or imprecision. Discuss both direction and magnitude of any potential bias                 | 14    |
| Interpretation           | 20 | Give a cautious overall interpretation of results considering objectives, limitations, multiplicity of analyses, results from similar studies, and other relevant evidence | 12-15 |
| Generalisability         | 21 | Discuss the generalisability (external validity) of the study results                                                                                                      | 13-15 |
| <b>Other information</b> |    |                                                                                                                                                                            |       |
| Funding                  | 22 | Give the source of funding and the role of the funders for the present study and, if applicable, for the original study on which the present article is based              | 15    |

\*Give information separately for exposed and unexposed groups.

**Note:** An Explanation and Elaboration article discusses each checklist item and gives methodological background and published examples of transparent reporting. The STROBE checklist is best used in conjunction with this article (freely available on the Web sites of PLoS Medicine at <http://www.plosmedicine.org/>, Annals of Internal Medicine at <http://www.annals.org/>, and Epidemiology at <http://www.epidem.com/>). Information on the STROBE Initiative is available at [www.strobe-statement.org](http://www.strobe-statement.org).



# BMJ Open

## Impact of a teaching hospital based multidisciplinary telemedicine program in Southwestern Colombia: A cross sectional resource analysis.

|                                 |                                                                                                                                                                                                                                                                                                                                                                                                                                                                                                                                                                                                                                                                                                                              |
|---------------------------------|------------------------------------------------------------------------------------------------------------------------------------------------------------------------------------------------------------------------------------------------------------------------------------------------------------------------------------------------------------------------------------------------------------------------------------------------------------------------------------------------------------------------------------------------------------------------------------------------------------------------------------------------------------------------------------------------------------------------------|
| Journal:                        | <i>BMJ Open</i>                                                                                                                                                                                                                                                                                                                                                                                                                                                                                                                                                                                                                                                                                                              |
| Manuscript ID                   | bmjopen-2024-084447.R1                                                                                                                                                                                                                                                                                                                                                                                                                                                                                                                                                                                                                                                                                                       |
| Article Type:                   | Original research                                                                                                                                                                                                                                                                                                                                                                                                                                                                                                                                                                                                                                                                                                            |
| Date Submitted by the Author:   | 03-Apr-2024                                                                                                                                                                                                                                                                                                                                                                                                                                                                                                                                                                                                                                                                                                                  |
| Complete List of Authors:       | Prada, Sergio Iván; Fundacion Valle del Lili, Subdirección de Investigación e Innovación; Universidad Icesi, Centro PROESA Toro, José Joaquín; Fundación Valle del Lili, Departamento de Costos y Presupuestos<br>Peña-Zárate, Evelyn E.; Fundacion Valle del Lili Centro de Investigaciones Clínicas, Centro de investigaciones clínicas Libreros-Peña, Laura; Fundacion Valle del Lili Centro de Investigaciones Clínicas, Centro de Investigaciones Clínicas Alarcón, Juliana; Fundacion Valle del Lili Centro de Investigaciones Clínicas, Centro de investigaciones clínicas Escobar, Maria Fernanda; Fundacion Valle del Lili, Unidad de Equidad Global en Salud ; Universidad Icesi, Facultad de Ciencias de la Salud |
| <b>Primary Subject Heading</b>: | Health economics                                                                                                                                                                                                                                                                                                                                                                                                                                                                                                                                                                                                                                                                                                             |
| Secondary Subject Heading:      | Public health                                                                                                                                                                                                                                                                                                                                                                                                                                                                                                                                                                                                                                                                                                                |
| Keywords:                       | Telemedicine < BIOTECHNOLOGY & BIOINFORMATICS, Latin America, HEALTH ECONOMICS                                                                                                                                                                                                                                                                                                                                                                                                                                                                                                                                                                                                                                               |
|                                 |                                                                                                                                                                                                                                                                                                                                                                                                                                                                                                                                                                                                                                                                                                                              |

SCHOLARONE™  
Manuscripts

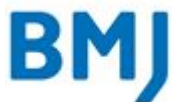

I, the Submitting Author has the right to grant and does grant on behalf of all authors of the Work (as defined in the below author licence), an exclusive licence and/or a non-exclusive licence for contributions from authors who are: i) UK Crown employees; ii) where BMJ has agreed a CC-BY licence shall apply, and/or iii) in accordance with the terms applicable for US Federal Government officers or employees acting as part of their official duties; on a worldwide, perpetual, irrevocable, royalty-free basis to BMJ Publishing Group Ltd ("BMJ") its licensees and where the relevant Journal is co-owned by BMJ to the co-owners of the Journal, to publish the Work in this journal and any other BMJ products and to exploit all rights, as set out in our [licence](#).

The Submitting Author accepts and understands that any supply made under these terms is made by BMJ to the Submitting Author unless you are acting as an employee on behalf of your employer or a postgraduate student of an affiliated institution which is paying any applicable article publishing charge ("APC") for Open Access articles. Where the Submitting Author wishes to make the Work available on an Open Access basis (and intends to pay the relevant APC), the terms of reuse of such Open Access shall be governed by a Creative Commons licence – details of these licences and which [Creative Commons](#) licence will apply to this Work are set out in our licence referred to above.

Other than as permitted in any relevant BMJ Author's Self Archiving Policies, I confirm this Work has not been accepted for publication elsewhere, is not being considered for publication elsewhere and does not duplicate material already published. I confirm all authors consent to publication of this Work and authorise the granting of this licence.

1  
2  
3 **Impact of a teaching hospital based multidisciplinary telemedicine program**  
4  
5 **in Southwestern Colombia: A cross sectional resource analysis.**  
6  
7

8 Sergio Iván Prada<sup>1,2</sup>, José Joaquín Toro<sup>3</sup>, Evelyn E. Peña-Zárate<sup>4</sup>, Laura Libreros-Peña<sup>4</sup>,  
9  
10 Juliana Alarcón<sup>4</sup>, María Fernanda Escobar<sup>5,6,7</sup>  
11  
12  
13

- 14 1. Subdirección de Investigación e Innovación, Fundación Valle del Lili, Cra. 98 no. 18-49,  
15 Cali 760032, Colombia  
16  
17 2. Centro PROESA, Universidad Icesi, Cali, Colombia.  
18  
19 3. Departamento de Costos y Presupuestos, Fundación Valle del Lili, Cra. 98 no. 18-49, Cali  
20 760032, Colombia.  
21  
22 4. Centro de Investigaciones Clínicas, Fundación Valle del Lili, Cra. 98 no. 18-49, Cali  
23 760032, Colombia.  
24  
25 5. Unidad de Equidad Global en Salud, Fundación Valle del Lili, Cra. 98 no. 18-49, Cali  
26 760032, Colombia.  
27  
28 6. Departamento de Ginecología y Obstetricia, Fundación Valle del Lili, Cra. 98 no. 18-49,  
29 Cali 760032, Colombia.  
30  
31 7. Facultad de Ciencias de la Salud, Universidad Icesi, Cali, Colombia  
32  
33  
34  
35  
36  
37  
38  
39  
40  
41

42 **Corresponding author:**

43 María Fernanda Escobar Vidarte MD, MsC

44 Fundación Valle del Lili. Cra 98 Nro.18-49 Cali 7600.2, Colombia

45  
46 Phone: (57)(2)3319090 Extension 3025-3055 Fax: (57) 2 3319090

47  
48 Email: [maria.escobar.vi@fvl.org.co](mailto:maria.escobar.vi@fvl.org.co) , [publicaciones@fvl.org.co](mailto:publicaciones@fvl.org.co)  
49  
50

51 **Abstract:**  
52  
53  
54  
55  
56  
57  
58  
59  
60

1  
2  
3 **Background:** Telemedicine, a method of healthcare service delivery bridging geographic  
4 distances between patients and providers, has gained prominence. This modality is particularly  
5 advantageous for outpatient consultations, addressing inherent barriers of travel time and cost.  
6  
7

8  
9 **Objective:** We aim to describe economical outcomes towards the implementation of a  
10 multidisciplinary telemedicine service in a high-complexity Hospital in Latin America, from the  
11 perspective of patients.  
12  
13

14  
15 **Design:** A cross-sectional study was conducted, analyzing the institutional data obtained over a  
16 period of 9 months, between April 2020 and December 2020.  
17  
18

19  
20 **Setting:** A high-complexity teaching hospital located in Cali, Colombia.  
21

22 **Participants:** Individuals who received care via telemedicine. The population was categorized  
23 into three groups based on their place of residence: Cali, Valle del Cauca excluding Cali, and  
24 Outside of Valle del Cauca.  
25  
26

27  
28 **Outcome measures:** Travel distance, time, fuel and public round-trip cost savings, and potential  
29 loss of productivity were estimated from the patient's perspective.  
30  
31

32 **Results:** A total of 62 258 teleconsultations were analyzed. Telemedicine led to a total distance  
33 savings of 4 514 903 kilometers, and 132 886 hours. The estimated cost savings were \$680 849  
34 USD for private transportation and \$1 087 849 USD for public transportation. Patients in the  
35 Outside of Valle del Cauca group experienced an estimated average time savings of 21.2 hours,  
36 translating to an average fuel savings of \$149.0 USD or an average savings of \$156.6 USD in  
37 public transportation costs. Areas with exclusive air access achieved a mean cost savings of  
38 \$362.9 USD per teleconsultation.  
39  
40  
41  
42  
43  
44  
45

46  
47 **Conclusion:** Telemedicine emerges as a powerful tool for achieving substantial travel savings for  
48 patients, especially in regions confronting geographical and socioeconomic obstacles. These  
49 findings underscore the potential of telemedicine to bridge healthcare accessibility gaps in low-  
50 and middle-income countries, calling for further investment and expansion of telemedicine  
51 services in such areas.  
52  
53  
54  
55  
56  
57

1  
2  
3 **Key Words:** Health economics, Telemedicine, Latin America.  
4  
5  
6

7 **Strengths and limitations**  
8

- 9
- 10 • A strength of this study is that it originates from a database rich in georeferenced  
11 information for each patient.  
12
  - 13 • Another strength is the use of actual costs of public and intermunicipal transportation  
14 for each individual in the dataset.  
15
  - 16 • A limitation of the study is that it did not take into account individual preferences for  
17 public or private transportation.  
18
  - 19 • Another limitation is that productivity loss estimation did not take into account the  
20 employment status of participants.  
21
  - 22 • Last, the measured calculations are indirect as there is no validated instrument to  
23 measure individuals' expenditure costs.  
24  
25  
26  
27  
28  
29

30  
31 **Introduction:**  
32

33 In the last decade, there have been significant technological advances in healthcare.  
34  
35 Telemedicine is a modality of healthcare services delivery, where patients and providers are  
36 separated by distance. Telehealth uses information and communication technology for the  
37 exchange of information, related to the diagnosis and treatment of diseases and injuries, and to  
38 strengthen research and continuing education of health professionals (1). This care model can be  
39 especially helpful for outpatient consultations, where barriers related to travel time and cost are  
40 constantly inherent for patients (2,3).  
41  
42

43  
44 Positive results regarding patient satisfaction and outcomes of telemedicine care have been  
45 reported in the literature (4). This tool has reduced costs in the health system of several countries  
46 (5,6). From the patient's perspective, despite its inherent limitations, telemedicine has been well-  
47 received and has generated excellent patient satisfaction (6,7). Telemedicine led savings for  
48  
49  
50  
51  
52  
53  
54  
55  
56  
57  
58  
59  
60

1  
2  
3 patients and their companions, mainly those related to care, including travel time, distance, and  
4 costs (8–10). However, most of the studies about patient savings related to telemedicine use had  
5 been conducted in high-income countries, providing information on the teleconsultation offered for  
6 a single state, locality, or city.  
7  
8  
9  
10

11 The development and enhancement of telemedicine in Colombia has been under discussion since  
12 2010. However, it wasn't until 2020, during the COVID-19 pandemic's public health emergency,  
13 that the government began to actively promote its utilization; this was driven by the enforcement  
14 of mandatory lockdown measures and the imperative to ensure continuous medical care. In this  
15 circumstance, Fundación Valle del Lili (FVL), a highly complex Colombian teaching hospital,  
16 quickly introduced a telemedicine service. Implementing this service encountered significant  
17 challenges, the availability of resources and the cultural resistance exhibited by patients toward  
18 this modality of attention (11). Our aim was to estimate the hypothetical transportation-related  
19 savings in time, distance, and costs assumed for the patients due to outpatient care by the FVL  
20 telemedicine program during April to December 2020.  
21  
22  
23  
24  
25  
26  
27  
28  
29  
30  
31  
32  
33  
34

## 35 **Methods:**

### 36 **Design and population:**

37 A retrospective study focused on the time and transportation cost savings experienced by the  
38 patients as a result of telemedicine interventions. Our study included patient who resided in  
39 Colombia and received outpatient teleconsultation through the FVL Telemedicine program  
40 between April and December 2020. We excluded patients residing in countries other than  
41 Colombia, as well as those lacking residence information or address details. The study population  
42 was categorized based on their place of residence into the following three groups (Figure 1):  
43  
44  
45  
46  
47  
48  
49  
50

- 51 - Cali: People who live in the city of Cali, Valle del Cauca.
- 52
- 53 - Valle del Cauca excluding Cali: people who live in other cities in Valle del Cauca,  
54 different to Cali.  
55  
56  
57  
58  
59  
60

- 1  
2  
3 - Outside of Valle del Cauca: people who live in other departments, different to Valle del  
4  
5 Cauca.  
6

7  
8 The sample size of patients for the city of Cali was determined based on the formula for  
9  
10 estimating the mean of a population with a specified margin of error of 0.5 km, a standard  
11  
12 deviation of 7 km, and  $Z=1.96$  for a 95% confidence interval. Rounding up to the nearest whole  
13  
14 number to ensure an integer sample size, the calculated sample size was 753. This calculation  
15  
16 did not correct for the finite population correction factor as the population size was large relative  
17  
18 to the sample size ( $N=19\ 630$ ). However, to ensure adequate statistical power the sample size  
19  
20 was increased by 8% to 814 participants. This resulted in a total of 1 708 teleconsultations in  
21  
22 the selected sample, indicating that a single individual may have undergone multiple  
23  
24 consultations and follow-up appointments throughout the study period. These consultations  
25  
26 represented 3.9% of the 44,182 teleconsultations conducted in this group. As a result,  
27  
28 calculations for the total savings in this group were later extrapolated by multiplying the value  
29  
30 obtained in the sample by 25.87.  
31  
32  
33  
34  
35  
36  
37  
38  
39  
40  
41  
42  
43  
44  
45  
46

47  
48 Green shaded area refers to the region of Valle del Cauca. Red point indicates Fundación Valle del Lili  
49  
50 (FVL). Green points represent areas of teleconsultation in Cali, Valle del Cauca excluding Cali, and areas  
51  
52 outside of Valle del Cauca

53 **Figure 1.** Study area map with locations of patient residences.  
54  
55  
56  
57  
58  
59  
60

### **Overview of Fundación Valle del Lili Telemedicine Program:**

In Colombia, hospitals are categorized into four levels based on their degree of specialization, subject to evaluation and approval by the national government. Level I hospitals primarily have low-complexity technology and provide care by general practitioners, offering outpatient consultations, hospitalization, emergency services, and essential diagnostic and treatment support. Level II hospitals expand their services to include gynecology and obstetrics, surgery, internal medicine, and pediatrics, incorporating technology of moderate complexity. Level III hospitals feature subspecialized personnel, adult and neonatal intensive care units, and advanced technology. At the highest level of care, Level IV hospitals cater to patients in critical condition, offering highly complex subspecialties and the potential for organ transplantation (12).

Moreover, it is noteworthy that the 3 largest cities in Colombia, Bogotá, Medellín, and Cali, concentrate the majority of Level III and IV hospitals in the country, providing comprehensive medical services to the surrounding population. Additionally, Colombia boasts only 16 government-accredited teaching hospitals, representing hubs of specialist concentration. Access to specialist care in Colombia's healthcare system requires authorization from the patient's healthcare plan, as patients cannot freely choose their own specialist. The patient healthcare plan assigns the care location based on contractual agreements, with telemedicine services typically included within the health plan. Conversely, smaller cities and towns may house Level 1 and 2 hospitals, offering care of basic to moderate complexity (12).

Fundación Valle del Lili (FVL) is a private, non-profit, high-complexity hospital located in Santiago de Cali, serving as a referral center in the southwest region of Colombia. In 2019 the institution provided 511,124 outpatient visits, 75,890 ER visits and 26,878 inpatient stays. FVL's telemedicine service, promoted and strengthened in March 2020 in response to the declaration of a health emergency by COVID-19 by the Ministry of Health, ensures the continuity of ambulatory health services throughout the Colombian territory. This initiative aims to address accessibility



1  
2  
3 challenges, particularly in rural regions, by extending high-level medical services to remote areas.  
4  
5 Through a robust referral and counter-referral mechanism, eligible patients requiring outpatient or  
6  
7 home-based management can access specialized consultations, facilitating consultation  
8  
9 scheduling and ensuring necessary care irrespective of geographic location.  
10

11  
12  
13 FVL's telemedicine service facilitates outpatient care across 64 medical specialties, employing an  
14  
15 interactive modality that establishes remote communication between patients and healthcare  
16  
17 professionals through real-time video calls. FVL's telemedicine service is meticulously organized  
18  
19 to ensure seamless access to outpatient care for patients. The process begins with appointment  
20  
21 scheduling via telephone, available from Monday to Friday between 7 a.m. and 5 p.m., and on  
22  
23 Saturdays from 8 a.m. to 1 p.m. Patients are carefully guided through administrative procedures,  
24  
25 supplemented by instructional emails detailing telemedicine processes. Appointment  
26  
27 confirmations are diligently conducted 24 hours in advance by verifying the submission of requisite  
28  
29 documents to the designated email address. Teleconsultations and real-time video calls are  
30  
31 facilitated through the Microsoft Teams platform. Patient data is recorded in the Enterprise  
32  
33 Resource Planning systems of the hospital (SAP-IS-H Software), which host the electronic  
34  
35 medical record. Following the consultation, a PDF containing consultation details, medical  
36  
37 directives, and prescriptions is dispatched to the patient's email address. Patients who have  
38  
39 difficulty due to low technology literacy or cognitive issues are assisted by the appointment agent  
40  
41 during the booking process. Additionally, the receptionist provides support during the  
42  
43 teleconsultation setup, including guidance on using the application for initiating the call.  
44  
45  
46  
47  
48

#### 49 **Outcome measures:**

50  
51 The following outcome measures were taken into consideration:  
52

- 53  
54 a) Travel distance savings: The distance in kilometer of round-trip that the patient would  
55  
56 have traveled for an in-person consultation at the FVL.  
57

- 1  
2  
3 b) Travel time savings: The time in hours of round-trip that the patient would have wasted  
4 for an in-person consultation at the FVL; it represents the patient work time loss due to  
5 the travel for an in-person consultation.  
6  
7  
8  
9 c) Travel cost savings: The expenses related to round-trip that the patient would have  
10 spent for an in-person consultation at the FVL. For all cases, two modes of  
11 transportation were considered: 1) private transportation, for which round-trip fuel  
12 expenses were calculated for; and 2) public transportation, for which taxi costs (Cali  
13 group) or intermunicipal bus costs (Valle del Cauca and Colombia groups) were  
14 calculated based on 2020 fare rates.  
15  
16  
17  
18  
19  
20  
21  
22 d) Potential loss of productivity: It pertains to the value of work time that the patient would  
23 have lost due to the round-trip travel required for in-person consultations. This  
24 particularly affects the adult population aged between 21 and 61 years. Additionally,  
25 the retirement age in Colombia for women is 57 years and for men is 62 years. Within  
26 the scope of the study, this constitutes a limitation as it was not measured.  
27  
28  
29  
30  
31

32 **Distance and time calculation:** Measurements of car transportation were performed using  
33 Google Maps, taking the main FVL center as the destination and the patient's place of residence  
34 as the origin. The patient's home address was defined by the address (for Cali residents) or the  
35 registered municipality of residence in the electronic medical record system. The car transport  
36 option and the quickest route were selected. The estimated distance and travel time were doubled  
37 to encompass the round-trip travel to and from the FVL.  
38  
39  
40  
41  
42  
43  
44

45 **Fuel cost calculation:** We took as a reference the cost per gallon of fuel reported by the Ministry  
46 of Mines and Energy for the year 2020 that was \$8 268 COP (\$2.24 USD); and an average  
47 consumption of 40 km traveled per gallon.  
48  
49  
50  
51

$$52 \text{ Fuel cost saved} = \frac{\text{Round trip distance (km)}}{40 \text{ (km)}} * \$ 8 268$$

53  
54  
55  
56  
57  
58  
59  
60

1  
2  
3 **Calculation of public transportation cost savings:** To calculate the cost public transportation  
4  
5 for the population living in Cali, we considered the cab fare reported by the Cali Municipal Hall for  
6  
7 the year 2020, which was \$84 COP for each 80 meters traveled. For residents in other areas of  
8  
9 Valle del Cauca and Colombia, we searched on the virtual platforms of the country's public  
10  
11 transportation terminals to determine the fare cost of inter-municipal bus travel from the different  
12  
13 localities to the city of Cali.  
14

15  
16 It should be highlighted that for the municipalities where river transportation is necessary, the  
17  
18 travel cost and time required for each municipality were consulted, in addition to the cost and time  
19  
20 of land transportation. For the municipalities that do not have land access, estimates were made  
21  
22 of the airfare costs, these were excluded in the calculations of distance and time savings.  
23

24 **Calculation of the potential loss of productivity:** In Colombia the legal minimum wage in force  
25  
26 for the year 2020 was \$877 803 COP (\$640.31 USD), the workday corresponds to 48 hours per  
27  
28 week, which is adjusted to 8 hours per day. The value of 1 hour worked was \$3 657 COP (\$2.67  
29  
30 USD). With the above, the value that the patient would have lost due to lost work time secondary  
31  
32 to the round-trip to attend an in-person consultation was calculated.  
33

$$\text{Work cost of time saved} = \text{Round trip time (hour)} * \$ 3\ 657 \text{ COP}$$

34  
35  
36 All costs were calculated with the Purchasing Power Parity Exchange rate of 1 370.9 COP per  
37  
38 USD as per CCEMG–EPPI Centre Cost Converter' (v.1.7 last update: January 2024)  
39  
40 (<https://eppi.ioe.ac.uk/costconversion/>) designed to facilitate international comparison of costs.  
41  
42 (13).  
43  
44  
45  
46

## 47 **Ethics Approval**

48  
49 This study was conducted according to the Declaration of Helsinki guidelines; and was classified  
50  
51 as a risk-free study according to resolution No. 008430 of 1993, article 11, numeral A of the  
52  
53 Ministry of Health and Social Protection of Colombia. The institutional ethics committee reviewed  
54  
55 and approved the protocol (Protocol No. 1742; IRB/EC No. 090 – 2021, Act No. 06 - 2021). This  
56  
57  
58  
59  
60

study did not require intervention or intentional modification of the biological, physiological, psychological, or social variables of the participants. Therefore, no informed consent was necessary.

### Patient and Public Involvement

None

### Results

A total of 296 170 outpatient care consultations were made from April to December 2020. Among these, 152 consultations were excluded due to patients residing outside of Colombia. Consequently, 296 018 consultations were included, out of which 62 258 (21.03%) were conducted via telemedicine, involving to 27 948 individuals (**Supplementary Table 1**). The median age of the population was 41 years (IQR 21-61), the majority were female (62.95%), and the median of teleconsultations per person were 1 (IQR 1-2) (**Table 1**). Further details regarding the distribution of the number of teleconsultations per patient can be observed in (**Figure 2**). Telemedicine services were primarily provided by Psychiatry (8 891, 14.28%), Endocrinology (6 088, 9.78%), and Psychology (4 603, 7.39%).

**Table 1.** Sociodemographic characteristics of the patients attended via telemedicine, between April and December 2020.

| Variable                                       | Total          | Cali           | Valle del Cauca<br>excluding Cali | Outside of Valle<br>del Cauca |
|------------------------------------------------|----------------|----------------|-----------------------------------|-------------------------------|
| <b>Age, median<br/>(IQR)</b>                   | 41 (21 - 61)   | 41 (22 - 61)   | 42 (19 - 61)                      | 41 (17 - 60.5)                |
| <b>Sex</b>                                     |                |                |                                   |                               |
| Female                                         | 17 594 (62.95) | 12 462 (63.48) | 3 573 (62.65)                     | 1 552 (59.58)                 |
| Male                                           | 10 354 (37.05) | 7 168 (36.52)  | 2 130 (37.35)                     | 1 053 (40.42)                 |
| <b>Number of teleconsultations per patient</b> |                |                |                                   |                               |

|        |                |                |               |               |
|--------|----------------|----------------|---------------|---------------|
| 1 - 2  | 22 136 (79.23) | 15 574 (79.34) | 4 499 (78.89) | 2 063 (79.19) |
| 3 - 5  | 4 100 (14.68)  | 2 817 (14.35)  | 870 (15.26)   | 413 (15.85)   |
| 6 - 10 | 1 078 (3.86)   | 783 (3.99)     | 198 (3.47)    | 97 (3.72)     |
| >10    | 624 (2.23)     | 456 (2.32)     | 136 (2.38)    | 32 (1.23)     |

**Figure 2.** Distribution of the frequency of teleconsultations per person.

Total travel savings in terms of distance amounted to 4 514 903 kilometers, and in terms of time, it reached 132 886 hours. The estimated travel cost savings were \$1 035 363 USD for private transportation (combining fuel cost savings and potential productivity gains) and \$ 1 442 363 USD for public transportation (cost of public transportation saved and potential productivity gains). The largest savings were in the rest of Colombia group, which are those people living in departments of Colombia other than Valle del Cauca. Table 2 shows the total and average savings per teleconsultation for each group. Furthermore, it was estimated that individuals residing in areas where access can only be achieved by air, a savings of \$134 USD (SD 131.17) per teleconsultation.

**Table 2.** Distance, time, fuel, and public transportation savings observed by telemedicine consultation, between April and December 2020.

| Variable | Total    | Cali     | Valle del Cauca<br>excluding Cali | Outside of<br>Valle del<br>Cauca |
|----------|----------|----------|-----------------------------------|----------------------------------|
|          | n=62,258 | n=44,182 | n=12,707                          | n=5,369                          |

|                                                                                          |                        |                        |                         |                        |
|------------------------------------------------------------------------------------------|------------------------|------------------------|-------------------------|------------------------|
| Number of patients<br>attended by telemedicine                                           | 27,948                 | 19,630                 | 5,703                   | 2,615                  |
| <b>Round-trip distance saved (km)</b>                                                    |                        |                        |                         |                        |
| Total                                                                                    | 4,514,903              | 644,758                | 1,295,538               | 2,574,607              |
| Mean (SD)                                                                                | 72.55 (190)            | 14.60 (9.44)           | 101.95 (82.88)          | 481.15 (454.02)        |
| Median (IQR)                                                                             | 20.80(8.6 -33.4)       | 11.60 (6 - 23.6)       | 76.40 (30.40 -<br>149)  | 328 (258 - 750)        |
| <b>Round-trip time saved (hours)</b>                                                     |                        |                        |                         |                        |
| Total                                                                                    | 132,886                | 43,461                 | 34,127                  | 55,298                 |
| Mean (SD)                                                                                | 1.80 (7.02)            | 0.98 (0.35)            | 2.69 (1.43)             | 10.33 (22.11)          |
| Median (IQR)                                                                             | 0.93 (0.43 -<br>1.27)  | 0.90 (0.67 -<br>1.27)  | 2.40 (1.33 - 3.17)      | 6.73 (5.63 -<br>17.0)  |
| <b>Potential loss of productivity (USD)</b>                                              |                        |                        |                         |                        |
| Total                                                                                    | 354,514                | 115,963                | 91,049                  | 147,533                |
| Mean (SD)                                                                                | 5.70 (18.73)           | 2.62 (0.92)            | 7.17 (3.82)             | 27.6 (59.0)            |
| Median (IQR)                                                                             | 3.39 (2.04 -<br>4.26)  | 2.40 (1.78 -<br>3.38)  | 6.40 (3.56 - 8.45)      | 18.0 (15.0 -<br>45.4)  |
| <b>Total fuel cost saved (USD)</b>                                                       |                        |                        |                         |                        |
| Total                                                                                    | 680,849                | 97,294                 | 195,337                 | 388,191                |
| Mean (SD)                                                                                | 10.94 (28.64)          | 2.20 (1.42)            | 15.37 (12.50)           | 72.5 (68.5)            |
| Median (IQR)                                                                             | 3.15 (1.30 -<br>5.05)  | 1.75 (0.90 -<br>3.56)  | 11.52 (4.58 -<br>22.47) | 49.5 (38.9 -<br>113.1) |
| <b>Total cost of public transportation saved* (USD)</b>                                  |                        |                        |                         |                        |
| Total                                                                                    | 1,087,849              | 494,237                | 185,582                 | 408,002                |
| Mean (SD)                                                                                | 17.48 (29.69)          | 11.19 (7.23)           | 14.60 (13.81)           | 76.2 (74.6)            |
| Median (IQR)                                                                             | 8.88 (5.84 -<br>19.76) | 8.88 (4.60 -<br>18.08) | 7.29 (5.84 -<br>21.25)) | 43,8 (40,8 -<br>109,4) |
| <b>Saved transportation costs for municipalities with exclusively air income (USD) *</b> |                        |                        |                         |                        |

|              |    |    |    |                             |
|--------------|----|----|----|-----------------------------|
| Total        | NA | NA | NA | 6,170                       |
| Mean (SD)    | NA | NA | NA | 362.92<br>(356.05)          |
| Median (IQR) | NA | NA | NA | 265.51 (265.51<br>- 496.03) |

\* Refers to teleconsultations from people living in areas with no land access: Guapi (Cauca), Timbiquí (Cauca), Leticia (Amazonas), San Andres (San Andres y Providencia).

NA: Not apply.

The mean number of teleconsultations per patient was 2.10 (SD2.54) in Cali, 2.23 (SD 3.14) in Valle del Cauca excluding Cali, and 2.05 (SD 2.28) for the Outside of Valle del Cauca group. The estimated mean cost savings for private transportation round-trip per patient was \$10.13 USD in Cali, \$66.79 USD in Valle del Cauca excluding Cali, and \$205.65 USD in outside of Valle del Cauca; and mean cost savings for public transportation expenses per patient was \$28.98 USD in Cali, \$50.22 USD in Valle del Cauca excluding Cali, and \$213.25USD in outside of Valle del Cauca . In addition, the transportation cost savings for individuals residing in areas with exclusive air access amounted to \$658.52 USD, with a standard deviation of \$392.49. **(Table 3).**

**Table 3.** Distance, time, fuel, and public transportation per patient (all visits), between April and December 2020.

| Variable                                    | Cali               | Valle del Cauca           | Outside of Valle     |
|---------------------------------------------|--------------------|---------------------------|----------------------|
|                                             | N=19,630<br>n= 814 | excluding Cali<br>N=5,703 | del Cauca<br>N=2,615 |
| Teleconsultations per patient,<br>mean (SD) | 2.10 (2.54)        | 2.23 (3.14)               | 2.05 (2.28)          |

|                                                                                                   |               |                 |                  |
|---------------------------------------------------------------------------------------------------|---------------|-----------------|------------------|
| Distance saved per patient (km),<br>mean (SD)                                                     | 30.64 (52.80) | 227.17 (398.38) | 988.33 (1556.41) |
| Time saved per patients (hours),<br>mean (SD)                                                     | 2.06 (2.90)   | 5.98 (9.26)     | 21.23 (51.47)    |
| Potential loss of productivity<br>(USD), mean (SD)                                                | 5.51 (7.75)   | 34.25 (60.7)    | 56.63 (137.33)   |
| Fuel cost saved per patient<br>(USD), mean (SD)                                                   | 4.62 (7.96)   | 32.54 (65.51)   | 149.02 (234.67)  |
| Cost of public transportation<br>saved* (USD), mean (SD)                                          | 23.47 (40.44) | 15.97 (24.70)   | 156.62 (251.04)  |
| Saved transportation costs for<br>municipalities with exclusively air<br>income (USD)*, mean (SD) | NA            | NA              | 658.52 (392.49)  |

\* Refers to teleconsultations from people living in areas with no land access: Guapi (Cauca), Timbiquí (Cauca), Leticia (Amazonas), San Andres (San Andres y Providencia).

NA: Not apply.

## Discussion:

In LMIC, the population at the base of the socioeconomic pyramid bears a disproportionately high burden of disease, often facing limited access to health services due to lower purchasing power and residence in underserved areas. In such contexts, there is an urgent need to identify innovative short-, medium-, and long-term to achieve effective universal health coverage, giving special strength to programs that allow access in the most remote and vulnerable areas (14,15). Strengthening telehealth systems has the potential to improve health and socioeconomic status of different population groups. Extending healthcare services to these remote areas through



1  
2  
3 telemedicine helps bridge this gap and facilitates substantial reductions in both time and distance  
4 (16–19). In Colombia, 7.2% of the population lives in rural areas (20), with significant challenges  
5 and obstacles when accessing healthcare services, particularly specialized medical care (15).  
6  
7  
8  
9

10  
11 In 2020, as the COVID-19 pandemic spread worldwide, world poverty increased, and poverty  
12 induced by COVID-19 (21). Colombia was significantly affected by this issue, with a noticeable  
13 deterioration in its economic growth indicators. In 2020, the pandemic led to a 6.8% decline in  
14 Colombia's economy (Gross Domestic Product (GDP)), contributing to an increase in the national  
15 unemployment rate by at least 8 percentage points, resulting in an average rate of 15.9, a 5.4  
16 percentage points rise from the previous year (22,23). Furthermore, the proportion of informal  
17 employment increased from 45% to 49% (24). Thus, savings achieved by the program were very  
18 timely in the midst of the worst economic year in Colombian history. The introduction of  
19 telemedicine led to average Potential loss of productivity savings of \$5.51 and \$34.25 USD per  
20 patient for the population of Cali and Valle del Cauca, equivalent to 26% and 75% of a full day's  
21 salary, respectively. For the population of Colombia, \$56.63 USD was saved per patient,  
22 representing 9% of the minimum monthly salary.  
23  
24  
25  
26  
27  
28  
29  
30  
31  
32  
33  
34  
35  
36  
37  
38

39 Transportation cost is a determining factor in access to health care, especially for those living in  
40 rural areas not having a tertiary or complex center nearby that can provide services by medical  
41 specialties (25). However, the need for more training in the use of technologies and the difficulties  
42 in acquiring technology that allows remote connection limits the implementation of telemedicine in  
43 these areas (6,26). In our study, the telemedicine program succeeded in extending its reach to  
44 remote locations facing geographical challenges. These areas are accessible solely by air or sea.  
45 Examples include municipalities such as Guapi, Timbiquí, Leticia, and San Andres Island.  
46  
47  
48  
49  
50  
51  
52  
53  
54  
55  
56  
57  
58  
59  
60

1  
2  
3 distance, and travel expenses for their residents (27). For people living in those municipalities  
4 savings in transportation costs estimated per patient exceeded the 2020 monthly minimum wage.  
5  
6  
7

8  
9 Significant savings related to transportation and fuel expenses have been reported. These costs  
10 vary widely; studies have reported savings ranging from \$4.66 to \$150 per teleconsultation (4,28).  
11  
12 Other studies have reported saved costs that encompass fuel expenses, insurance, and  
13 maintenance, resulting in higher per-person savings. Few studies have addressed costs related  
14 to public transportation; given the importance of public transportation in Colombia, especially  
15 between and within cities, this variable was key for a more realistic measurement (29). When  
16 comparing the average public transportation expenses saved for the Cali, Valle del Cauca, and  
17 rest of Colombia locations to the legal monthly minimum salary in Colombia for year 2020, it  
18 represents 3.67%, 5.08%, and 24.19%, respectively for the average patient.  
19  
20  
21  
22  
23  
24  
25  
26  
27  
28  
29

30 Limitations of the current study include the retrospective approach to data collection, which limited  
31 the depth of analysis possible. Prospective data collection would have allowed for a more  
32 comprehensive examination, including factors such as work absenteeism, wait times, appointment  
33 duration, and associated costs. In addition, the absence of provider expenditures in the cost-  
34 effectiveness assessment of telemedicine represents a significant gap. On the other hand, the  
35 Colombian healthcare system fully covers diagnostic and treatment services, which may mitigate  
36 the cost impact on patients or hospitals. However, the study did not measure these consequences  
37 and costs, which is a limitation.  
38  
39  
40  
41  
42  
43  
44  
45  
46  
47  
48

49 The study also overlooked critical factors like internet usage and telecommunications connectivity,  
50 impacting the assessment of cost savings achieved through telemedicine adoption. Failure to  
51 consider participants' transportation mode and employment status hindered insights into  
52 socioeconomic dynamics influencing telemedicine utilization. Methodologically, the indirect  
53  
54  
55  
56  
57  
58  
59  
60

1  
2  
3 calculation of expenditures introduced ambiguity, compounded by the absence of a validated  
4 instrument for precise measurement. Our objective in this paper was measuring savings using TM  
5 in comparison to a regular visit by the patient to our location, we did not seek a full economic  
6 evaluation which will include a cost-effectiveness (CE) study. The CE literature has shown that  
7 from a health systems perspective telemedicine programs remain cost-effective, but from a  
8 societal perspective there is a gap, and we leave a full economic evaluation for further research.  
9  
10  
11  
12  
13  
14  
15  
16  
17

### 18 **Future implications**

19  
20 The results encourage developing public policies and strengthening strategies incorporating digital  
21 health and telemedicine in Latin America's countries. Our experience shows results aimed at  
22 reducing indirect patient costs related to providing health services and facilitating care by multiple  
23 specialties through teleconsultation.  
24  
25  
26  
27  
28  
29

### 30 **Conclusion:**

31  
32 Telemedicine brings to patients a significant travel savings, both in terms of time, distance, cost  
33 and potential loss of productivity; particularly in regions facing geographical and socioeconomic  
34 challenges. These findings emphasize the potential of telemedicine to bridge healthcare  
35 accessibility gaps in middle-income countries and the need to further develop and expand  
36 telemedicine services in such areas.  
37  
38  
39  
40  
41  
42

### 43 **Funding**

44  
45 This research received no specific grant from any funding agency in the public, commercial or not-  
46 for-profit sectors.  
47  
48  
49  
50

### 51 **Conflicts of Interest**

52  
53 The authors report there are no competing interests to declare.  
54  
55  
56  
57  
58  
59  
60

### **Data availability statement**

The data that support the findings of this study are available from the corresponding author [MFE], upon reasonable request.

### **Acknowledgements**

We thank to the Fundación Valle del Lili, especially the department of cost and budget for providing and supporting this current research.

### **Author contributions**

SIP and MFE designed and supervised the study; JJT and JA contributed to data collection; SIP, JJT, EEP and LLP contributed data analysis; SIP, MFE, EEP, LLP and JA contributed to literature review; EEP, LLP, JA, SIP and MFE contributed to drafted the manuscript. All authors read drafts of the manuscript and approved the final version

### **References:**

1. World Health Organization, International Telecommunication Union. WHO-ITU global standard for accessibility of telehealth services. En Geneva; 2022 [citado 28 de abril de 2023]. Disponible en: <https://www.who.int/publications-detail-redirect/9789240050464>
2. Bynum AB, Irwin CA, Cranford CO, Denny GS. The impact of telemedicine on patients' cost savings: some preliminary findings. *Telemed J E Health*. 2003;9(4):361-7.
3. Spaulding R, Belz N, DeLurgio S, Williams AR. Cost savings of telemedicine utilization for child psychiatry in a rural Kansas community. *Telemed J E Health*. octubre de 2010;16(8):867-71.
4. Dullet NW, Geraghty EM, Kaufman T, Kissee JL, King J, Dharmar M, et al. Impact of a University-Based Outpatient Telemedicine Program on Time Savings, Travel Costs, and Environmental Pollutants. *Value Health*. abril de 2017;20(4):542-6.

- 1  
2  
3 5. Snoswell CL, Taylor ML, Comans TA, Smith AC, Gray LC, Caffery LJ. Determining if  
4  
5 Telehealth Can Reduce Health System Costs: Scoping Review. *J Med Internet Res*. 19 de  
6  
7 octubre de 2020;22(10):e17298.
- 8  
9 6. Almathami HKY, Win KT, Vlahu-Gjorgievska E. Barriers and Facilitators That Influence  
10  
11 Telemedicine-Based, Real-Time, Online Consultation at Patients' Homes: Systematic  
12  
13 Literature Review. *J Med Internet Res*. 20 de febrero de 2020;22(2):e16407.
- 14  
15 7. Eze ND, Mateus C, Hashiguchi TCO. Telemedicine in the OECD: An umbrella review of  
16  
17 clinical and cost-effectiveness, patient experience and implementation. *PLOS ONE*. 13 de  
18  
19 agosto de 2020;15(8):e0237585.
- 20  
21 8. Hussaini SMQ, Gupta A, Dusetzina SB. Financial Toxicity of Cancer Treatment. *JAMA*  
22  
23 *Oncology*. 1 de mayo de 2022;8(5):788.
- 24  
25 9. Tuckson RV, Edmunds M, Hodgkins ML. Telehealth. *N Engl J Med*. 19 de octubre de  
26  
27 2017;377(16):1585-92.
- 28  
29 10. Patel KB, Turner K, Alishahi Tabriz A, Gonzalez BD, Oswald LB, Nguyen OT, et al. Estimated  
30  
31 Indirect Cost Savings of Using Telehealth Among Nonelderly Patients With Cancer. *JAMA*  
32  
33 *Network Open*. 10 de enero de 2023;6(1):e2250211.
- 34  
35 11. Luis Mauricio Figueroa. Telehealth in Colombia, challenges associated with COVID-19. 12 de  
36  
37 noviembre de 2020;40(2):77-9.
- 38  
39 12. Escobar MF, Echavarría MP, Carvajal JA, Lesmes MC, Porrás AM, Mesa V, Ávila-Sánchez  
40  
41 FA, Gallego JC, Riascos NC, Hurtado D, Fernández PA, Posada L, Hernández AM, Ramos I,  
42  
43 Irurita MI, Loaiza JS, Echeverri D, Gonzalez L, Peña-Zárate EE, Libreros-Peña L, Galindo JS,  
44  
45 Granados M. Hospital padrino: a collaborative strategy model to tackle maternal mortality: a  
46  
47 mixed methods study in a middle-income region. *Lancet Reg Health Am*. 2024 Mar 1;31:100705.  
48  
49 doi: 10.1016/j.lana.2024.100705.  
50  
51  
52  
53  
54  
55  
56  
57  
58  
59  
60

13. Shemilt I, James T, Marcello M. A web-based tool for adjusting costs to a specific target currency and price year. *Evid Policy* [Internet]. 2010;6(1) [citado 1 de septiembre 2023]:51–9. Disponible en: <http://dx.doi.org/10.1332/174426410x482999>
14. Departamento Administrativo Nacional de Estadística (DANE). Situación de las mujeres rurales desde las estadísticas oficiales [Internet]. 2022 [citado 1 de septiembre de 2023]. Disponible en: <https://www.dane.gov.co/files/investigaciones/notas-estadisticas/oct-2022-nota-estadistica-mujer-rural-presentacion.pdf>
15. Brundisini F, Giacomini M, DeJean D, Vanstone M, Winsor S, Smith A. Chronic disease patients' experiences with accessing health care in rural and remote areas: a systematic review and qualitative meta-synthesis. *Ont Health Technol Assess Ser*. 2013;13(15):1-33.
16. Speyer R, Denman D, Wilkes-Gillan S, Chen YW, Bogaardt H, Kim JH, et al. Effects of telehealth by allied health professionals and nurses in rural and remote areas: A systematic review and meta-analysis. *Journal of Rehabilitation Medicine*. 2018;50(3):225-35.
17. Carroll M, Cullen T, Ferguson S, Hogge N, Horton M, Kokesh J. Innovation in Indian Healthcare: Using Health Information Technology to Achieve Health Equity for American Indian and Alaska Native Populations. *Perspect Health Inf Manag*. 1 de enero de 2011;8(Winter):1d.
18. Lagomarsino G, Garabrant A, Adyas A, Muga R, Otoo N. Moving towards universal health coverage: health insurance reforms in nine developing countries in Africa and Asia. *Lancet*. 8 de septiembre de 2012;380(9845):933-43.
19. Balabanova D, Mills A, Conteh L, Akkazieva B, Banteyerga H, Dash U, et al. Good Health at Low Cost 25 years on: lessons for the future of health systems strengthening. *Lancet*. 15 de junio de 2013;381(9883):2118-33.
20. Dirección de Epidemiología y Demografía. Análisis de Situación de Salud (ASIS) Colombia, 2020. Ministerio de Salud y Protección Social; 2020.

- 1  
2  
3 21. Moyer JD, Verhagen W, Mapes B, Bohl DK, Xiong Y, Yang V, et al. How many people is the  
4 COVID-19 pandemic pushing into poverty? A long-term forecast to 2050 with alternative  
5 scenarios. PLoS One. 8 de julio de 2022;17(7):e0270846.  
6  
7
- 8  
9 22. Departamento Administrativo Nacional de Estadística (DANE). Comunicado de prensa  
10 Producto Interno Bruto (PIB) IV trimestre y año 2020. Bogotá D.C; 2021 feb p. 1-10.  
11
- 12  
13 23. Departamento Administrativo Nacional de Estadística (DANE). Boletín Técnico Gran  
14 Encuesta Integrada de Hogares (GEIH) Diciembre 2020 [Internet]. Bogotá D.C; 2021 ene  
15 [citado 1 de septiembre de 2023] p. 1-36. Disponible en:  
16 [https://www.dane.gov.co/files/investigaciones/boletines/ech/ech/bol\\_empleo\\_dic\\_20.pdf](https://www.dane.gov.co/files/investigaciones/boletines/ech/ech/bol_empleo_dic_20.pdf)  
17  
18
- 19  
20 24. Departamento Administrativo Nacional de Estadísticas - DANE [Internet]. [citado 1 de  
21 septiembre de 2023]. Empleo informal y seguridad social. Disponible en:  
22 [https://www.dane.gov.co/index.php/estadisticas-por-tema/salud/informalidad-y-seguridad-](https://www.dane.gov.co/index.php/estadisticas-por-tema/salud/informalidad-y-seguridad-social/empleo-informal-y-seguridad-social-historicos)  
23 [social/empleo-informal-y-seguridad-social-historicos](https://www.dane.gov.co/index.php/estadisticas-por-tema/salud/informalidad-y-seguridad-social/empleo-informal-y-seguridad-social-historicos)  
24  
25
- 26  
27 25. Wolfe MK, McDonald NC, Holmes GM. Transportation Barriers to Health Care in the United  
28 States: Findings From the National Health Interview Survey, 1997-2017. Am J Public Health.  
29 junio de 2020;110(6):815-22.  
30
- 31  
32 26. Zachrison KS, Boggs KM, Hayden EM, Espinola JA, Camargo CA. Understanding Barriers to  
33 Telemedicine Implementation in Rural Emergency Departments. Ann Emerg Med. marzo de  
34 2020;75(3):392-9.  
35
- 36  
37 27. Atmojo JT, Widiyanto A, Ernawati E, Arradini D, Tri Sudaryanto, Wahyu. Telemedicine, Cost  
38 Effectiveness, and Patients Satisfaction: A Systematic Review. J HEALTH POLICY MANAGE.  
39 2020;5(2):103-7.  
40  
41
- 42  
43 28. Paquette S, Lin JC. Outpatient Telemedicine Program in Vascular Surgery Reduces Patient  
44 Travel Time, Cost, and Environmental Pollutant Emissions. Ann Vasc Surg. agosto de  
45 2019;59:167-72.  
46  
47  
48  
49  
50  
51  
52  
53  
54  
55  
56  
57  
58  
59  
60

1  
2  
3  
4  
5  
6  
7  
8  
9  
10  
11  
12  
13  
14  
15  
16  
17  
18  
19  
20  
21  
22  
23  
24  
25  
26  
27  
28  
29  
30  
31  
32  
33  
34  
35  
36  
37  
38  
39  
40  
41  
42  
43  
44  
45  
46  
47  
48  
49  
50  
51  
52  
53  
54  
55  
56  
57  
58  
59  
60

29. Ministerio de Transporte. Transporte en Cifras 2021. Anuario Nacional de Transporte. 12.a ed. 2022;55-8.

For peer review only



1  
2  
3  
4  
5  
6  
7  
8  
9  
10  
11  
12  
13  
14  
15  
16  
17  
18  
19  
20  
21  
22  
23  
24  
25  
26  
27  
28  
29  
30  
31  
32  
33  
34  
35  
36  
37  
38  
39  
40  
41  
42  
43  
44  
45  
46  
47  
48  
49  
50  
51  
52  
53  
54  
55  
56  
57  
58  
59  
60

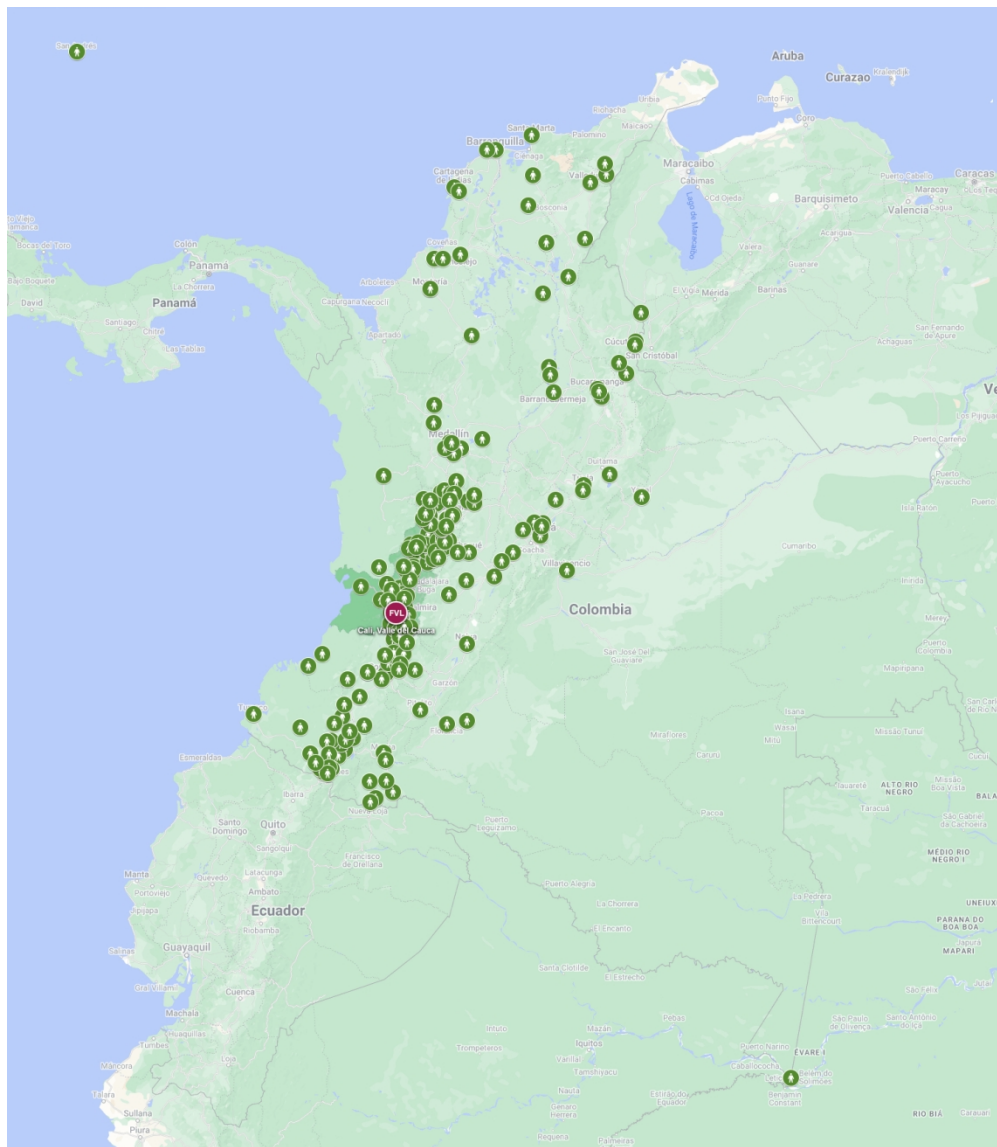

Green shaded area refers to the region of Valle del Cauca. Red point indicates Fundación Valle del Lili (FVL). Green points represent areas of teleconsultation in Cali, Valle del Cauca excluding Cali, and areas outside of Valle del Cauca

Figure 1. Study area map with locations of patient residences.

127x144mm (300 x 300 DPI)

1  
2  
3  
4  
5  
6  
7  
8  
9  
10  
11  
12  
13  
14  
15  
16  
17  
18  
19  
20  
21  
22  
23  
24  
25  
26  
27  
28  
29  
30  
31  
32  
33  
34  
35  
36  
37  
38  
39  
40  
41  
42  
43  
44  
45  
46  
47  
48  
49  
50  
51  
52  
53  
54  
55  
56  
57  
58  
59  
60

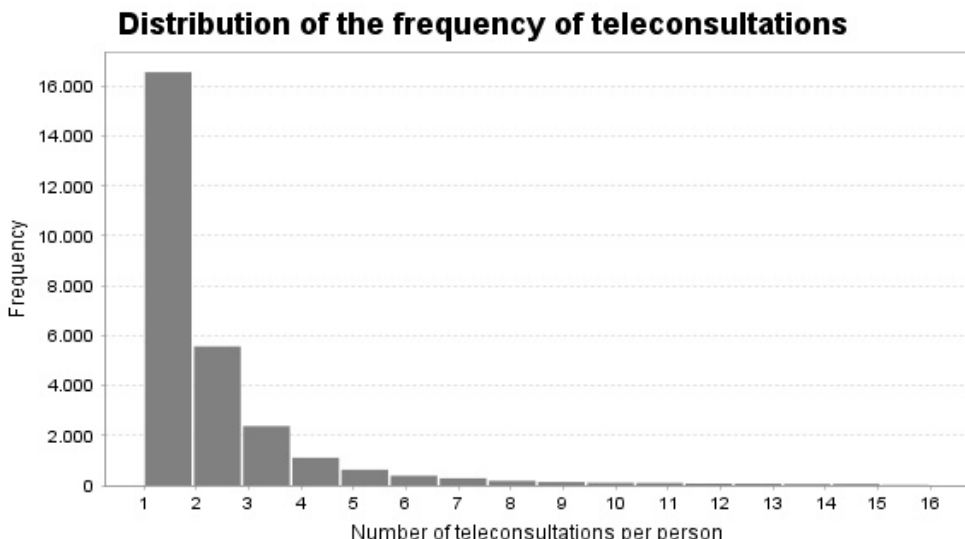

Figure 2. Distribution of the frequency of teleconsultations per person.

206x114mm (72 x 72 DPI)

**Supplementary Table 1.** Number of outpatient care provided per month according to modality of care, between April and December 2020.

| <b>Month</b> | <b>Telemedicine consultations</b> | <b>In-person consultations</b> |
|--------------|-----------------------------------|--------------------------------|
| April        | 4 181                             | 8 920                          |
| May          | 7 378                             | 13 674                         |
| June         | 7 770                             | 20 576                         |
| July         | 9 427                             | 25 897                         |
| August       | 8 117                             | 24 679                         |
| September    | 7 707                             | 33 305                         |
| October      | 6 521                             | 36 153                         |
| November     | 5 609                             | 36 094                         |
| December     | 5 548                             | 34 462                         |
| <b>Total</b> | <b>62 258</b>                     | <b>233 760</b>                 |

STROBE Statement—Checklist of items that should be included in reports of *cross-sectional studies*

|                              | Item No                                                                            | Recommendation                                                                                                                                                                                               | Page No |
|------------------------------|------------------------------------------------------------------------------------|--------------------------------------------------------------------------------------------------------------------------------------------------------------------------------------------------------------|---------|
| <b>Title and abstract</b>    | 1                                                                                  | (a) Indicate the study's design with a commonly used term in the title or the abstract                                                                                                                       | 1       |
|                              |                                                                                    | (b) Provide in the abstract an informative and balanced summary of what was done and what was found                                                                                                          | 2-3     |
| <b>Introduction</b>          |                                                                                    |                                                                                                                                                                                                              |         |
| Background/rationale         | 2                                                                                  | Explain the scientific background and rationale for the investigation being reported                                                                                                                         | 3-4     |
| Objectives                   | 3                                                                                  | State specific objectives, including any prespecified hypotheses                                                                                                                                             | 4       |
| <b>Methods</b>               |                                                                                    |                                                                                                                                                                                                              |         |
| Study design                 | 4                                                                                  | Present key elements of study design early in the paper                                                                                                                                                      | 4-5     |
| Setting                      | 5                                                                                  | Describe the setting, locations, and relevant dates, including periods of recruitment, exposure, follow-up, and data collection                                                                              | 4-5     |
| Participants                 | 6                                                                                  | (a) Give the eligibility criteria, and the sources and methods of selection of participants                                                                                                                  | 4-5     |
| Variables                    | 7                                                                                  | Clearly define all outcomes, exposures, predictors, potential confounders, and effect modifiers. Give diagnostic criteria, if applicable                                                                     | 5-6     |
| Data sources/<br>measurement | 8*                                                                                 | For each variable of interest, give sources of data and details of methods of assessment (measurement). Describe comparability of assessment methods if there is more than one group                         | 6-7     |
| Bias                         | 9                                                                                  | Describe any efforts to address potential sources of bias                                                                                                                                                    | 6-7     |
| Study size                   | 10                                                                                 | Explain how the study size was arrived at                                                                                                                                                                    | 4-5     |
| Quantitative variables       | 11                                                                                 | Explain how quantitative variables were handled in the analyses. If applicable, describe which groupings were chosen and why                                                                                 | 6-7     |
| Statistical methods          | 12                                                                                 | (a) Describe all statistical methods, including those used to control for confounding                                                                                                                        | 5-7     |
|                              |                                                                                    | (b) Describe any methods used to examine subgroups and interactions                                                                                                                                          | 4-7     |
|                              | (c) Explain how missing data were addressed                                        | NA                                                                                                                                                                                                           |         |
|                              | (d) If applicable, describe analytical methods taking account of sampling strategy | 4-5                                                                                                                                                                                                          |         |
|                              | (e) Describe any sensitivity analyses                                              | NA                                                                                                                                                                                                           |         |
| <b>Results</b>               |                                                                                    |                                                                                                                                                                                                              |         |
| Participants                 | 13*                                                                                | (a) Report numbers of individuals at each stage of study—eg numbers potentially eligible, examined for eligibility, confirmed eligible, included in the study, completing follow-up, and analysed            | 8-12    |
|                              |                                                                                    | (b) Give reasons for non-participation at each stage                                                                                                                                                         | NA      |
|                              |                                                                                    | (c) Consider use of a flow diagram                                                                                                                                                                           | NA      |
| Descriptive data             | 14*                                                                                | (a) Give characteristics of study participants (eg demographic, clinical, social) and information on exposures and potential confounders                                                                     | 8-12    |
|                              |                                                                                    | (b) Indicate number of participants with missing data for each variable of interest                                                                                                                          | NA      |
| Outcome data                 | 15*                                                                                | Report numbers of outcome events or summary measures                                                                                                                                                         | 8-12    |
| Main results                 | 16                                                                                 | (a) Give unadjusted estimates and, if applicable, confounder-adjusted estimates and their precision (eg, 95% confidence interval). Make clear which confounders were adjusted for and why they were included | 8-12    |

|                          |    |                                                                                                                                                                            |       |
|--------------------------|----|----------------------------------------------------------------------------------------------------------------------------------------------------------------------------|-------|
|                          |    | (b) Report category boundaries when continuous variables were categorized                                                                                                  | 8-12  |
|                          |    | (c) If relevant, consider translating estimates of relative risk into absolute risk for a meaningful time period                                                           | NA    |
| Other analyses           | 17 | Report other analyses done—eg analyses of subgroups and interactions, and sensitivity analyses                                                                             | 8-12  |
| <b>Discussion</b>        |    |                                                                                                                                                                            |       |
| Key results              | 18 | Summarise key results with reference to study objectives                                                                                                                   | 12-14 |
| Limitations              | 19 | Discuss limitations of the study, taking into account sources of potential bias or imprecision. Discuss both direction and magnitude of any potential bias                 | 14    |
| Interpretation           | 20 | Give a cautious overall interpretation of results considering objectives, limitations, multiplicity of analyses, results from similar studies, and other relevant evidence | 12-15 |
| Generalisability         | 21 | Discuss the generalisability (external validity) of the study results                                                                                                      | 13-15 |
| <b>Other information</b> |    |                                                                                                                                                                            |       |
| Funding                  | 22 | Give the source of funding and the role of the funders for the present study and, if applicable, for the original study on which the present article is based              | 15    |

\*Give information separately for exposed and unexposed groups.

**Note:** An Explanation and Elaboration article discusses each checklist item and gives methodological background and published examples of transparent reporting. The STROBE checklist is best used in conjunction with this article (freely available on the Web sites of PLoS Medicine at <http://www.plosmedicine.org/>, Annals of Internal Medicine at <http://www.annals.org/>, and Epidemiology at <http://www.epidem.com/>). Information on the STROBE Initiative is available at [www.strobe-statement.org](http://www.strobe-statement.org).

# BMJ Open

## Impact of a teaching hospital based multidisciplinary telemedicine program in Southwestern Colombia: A cross sectional resource analysis.

|                                 |                                                                                                                                                                                                                                                                                                                                                                                                                                                                                                                                                                                                                                                                                                                                 |
|---------------------------------|---------------------------------------------------------------------------------------------------------------------------------------------------------------------------------------------------------------------------------------------------------------------------------------------------------------------------------------------------------------------------------------------------------------------------------------------------------------------------------------------------------------------------------------------------------------------------------------------------------------------------------------------------------------------------------------------------------------------------------|
| Journal:                        | <i>BMJ Open</i>                                                                                                                                                                                                                                                                                                                                                                                                                                                                                                                                                                                                                                                                                                                 |
| Manuscript ID                   | bmjopen-2024-084447.R2                                                                                                                                                                                                                                                                                                                                                                                                                                                                                                                                                                                                                                                                                                          |
| Article Type:                   | Original research                                                                                                                                                                                                                                                                                                                                                                                                                                                                                                                                                                                                                                                                                                               |
| Date Submitted by the Author:   | 16-Apr-2024                                                                                                                                                                                                                                                                                                                                                                                                                                                                                                                                                                                                                                                                                                                     |
| Complete List of Authors:       | Prada, Sergio Iván; Fundacion Valle del Lili, Subdirección de Investigación e Innovación; Universidad Icesi, Centro PROESA<br>Toro, José Joaquín; Fundación Valle del Lili, Departamento de Costos y Presupuestos<br>Peña-Zárate, Evelyn E.; Fundacion Valle del Lili Centro de Investigaciones Clínicas, Centro de investigaciones clínicas<br>Libreros-Peña, Laura; Fundacion Valle del Lili Centro de Investigaciones Clínicas, Centro de Investigaciones Clínicas<br>Alarcón, Juliana; Fundacion Valle del Lili Centro de Investigaciones Clínicas, Centro de investigaciones clínicas<br>Escobar, Maria; Fundacion Valle del Lili, Unidad de Equidad Global en Salud ; Universidad Icesi, Facultad de Ciencias de la Salud |
| <b>Primary Subject Heading</b>: | Health economics                                                                                                                                                                                                                                                                                                                                                                                                                                                                                                                                                                                                                                                                                                                |
| Secondary Subject Heading:      | Public health                                                                                                                                                                                                                                                                                                                                                                                                                                                                                                                                                                                                                                                                                                                   |
| Keywords:                       | Telemedicine < BIOTECHNOLOGY & BIOINFORMATICS, Latin America, HEALTH ECONOMICS                                                                                                                                                                                                                                                                                                                                                                                                                                                                                                                                                                                                                                                  |
|                                 |                                                                                                                                                                                                                                                                                                                                                                                                                                                                                                                                                                                                                                                                                                                                 |

SCHOLARONE™  
Manuscripts



I, the Submitting Author has the right to grant and does grant on behalf of all authors of the Work (as defined in the below author licence), an exclusive licence and/or a non-exclusive licence for contributions from authors who are: i) UK Crown employees; ii) where BMJ has agreed a CC-BY licence shall apply, and/or iii) in accordance with the terms applicable for US Federal Government officers or employees acting as part of their official duties; on a worldwide, perpetual, irrevocable, royalty-free basis to BMJ Publishing Group Ltd ("BMJ") its licensees and where the relevant Journal is co-owned by BMJ to the co-owners of the Journal, to publish the Work in this journal and any other BMJ products and to exploit all rights, as set out in our [licence](#).

The Submitting Author accepts and understands that any supply made under these terms is made by BMJ to the Submitting Author unless you are acting as an employee on behalf of your employer or a postgraduate student of an affiliated institution which is paying any applicable article publishing charge ("APC") for Open Access articles. Where the Submitting Author wishes to make the Work available on an Open Access basis (and intends to pay the relevant APC), the terms of reuse of such Open Access shall be governed by a Creative Commons licence – details of these licences and which [Creative Commons](#) licence will apply to this Work are set out in our licence referred to above.

Other than as permitted in any relevant BMJ Author's Self Archiving Policies, I confirm this Work has not been accepted for publication elsewhere, is not being considered for publication elsewhere and does not duplicate material already published. I confirm all authors consent to publication of this Work and authorise the granting of this licence.

1  
2  
3 **Impact of a teaching hospital based multidisciplinary telemedicine program**  
4  
5 **in Southwestern Colombia: A cross sectional resource analysis.**  
6  
7

8 Sergio Iván Prada<sup>1,2</sup>, José Joaquín Toro<sup>3</sup>, Evelyn E. Peña-Zárate<sup>4</sup>, Laura Libreros-Peña<sup>4</sup>,  
9  
10 Juliana Alarcón<sup>4</sup>, María Fernanda Escobar<sup>5,6,7</sup>  
11  
12  
13

- 14 1. Subdirección de Investigación e Innovación, Fundación Valle del Lili, Cra. 98 no. 18-49,  
15 Cali 760032, Colombia  
16  
17 2. Centro PROESA, Universidad Icesi, Cali, Colombia.  
18  
19 3. Departamento de Costos y Presupuestos, Fundación Valle del Lili, Cra. 98 no. 18-49, Cali  
20 760032, Colombia.  
21  
22 4. Centro de Investigaciones Clínicas, Fundación Valle del Lili, Cra. 98 no. 18-49, Cali  
23 760032, Colombia.  
24  
25 5. Unidad de Equidad Global en Salud, Fundación Valle del Lili, Cra. 98 no. 18-49, Cali  
26 760032, Colombia.  
27  
28 6. Departamento de Ginecología y Obstetricia, Fundación Valle del Lili, Cra. 98 no. 18-49,  
29 Cali 760032, Colombia.  
30  
31 7. Facultad de Ciencias de la Salud, Universidad Icesi, Cali, Colombia  
32  
33  
34  
35  
36  
37  
38  
39  
40  
41

42 **Corresponding author:**

43 María Fernanda Escobar Vidarte MD, MsC

44 Fundación Valle del Lili. Cra 98 Nro.18-49 Cali 7600.2, Colombia

45  
46 Phone: (57)(2)3319090 Extension 3025-3055 Fax: (57) 2 3319090  
47

48 Email: [maria.escobar.vi@fvl.org.co](mailto:maria.escobar.vi@fvl.org.co) , [publicaciones@fvl.org.co](mailto:publicaciones@fvl.org.co)  
49  
50  
51  
52  
53  
54  
55  
56  
57  
58  
59  
60



**Abstract:**

**Background:** Telemedicine, a method of healthcare service delivery bridging geographic distances between patients and providers, has gained prominence. This modality is particularly advantageous for outpatient consultations, addressing inherent barriers of travel time and cost.

**Objective:** We aim to describe economical outcomes towards the implementation of a multidisciplinary telemedicine service in a high-complexity Hospital in Latin America, from the perspective of patients.

**Design:** A cross-sectional study was conducted, analyzing the institutional data obtained over a period of 9 months, between April 2020 and December 2020.

**Setting:** A high-complexity teaching hospital located in Cali, Colombia.

**Participants:** Individuals who received care via telemedicine. The population was categorized into three groups based on their place of residence: Cali, Valle del Cauca excluding Cali, and Outside of Valle del Cauca.

**Outcome measures:** Travel distance, time, fuel and public round-trip cost savings, and potential loss of productivity were estimated from the patient's perspective.

**Results:** A total of 62 258 teleconsultations were analyzed. Telemedicine led to a total distance savings of 4 514 903 kilometers, and 132 886 hours. The estimated cost savings were \$680 849 USD for private transportation and \$1 087 849 USD for public transportation. Patients in the Outside of Valle del Cauca group experienced an estimated average time savings of 21.2 hours, translating to an average fuel savings of \$149.0 USD or an average savings of \$156.6 USD in public transportation costs. Areas with exclusive air access achieved a mean cost savings of \$362.9 USD per teleconsultation, specifically related to transportation costs.

**Conclusion:** Telemedicine emerges as a powerful tool for achieving substantial travel savings for patients, especially in regions confronting geographical and socioeconomic obstacles. These findings underscore the potential of telemedicine to bridge healthcare accessibility gaps in low-

1  
2  
3 and middle-income countries, calling for further investment and expansion of telemedicine  
4 services in such areas.  
5

6  
7 **Key Words:** Health economics, Telemedicine, Latin America.  
8  
9

### 10 11 **Strengths and limitations** 12

- 13 • This study originates from a database rich in georeferenced information for each patient.
- 14 • The study utilizes actual costs of public and intermunicipal transportation for each  
15 individual in the dataset.
- 16 • Individual preferences for public or private transportation were not accounted for in this  
17 study.
- 18 • Productivity loss estimation did not consider the employment status of participants.
- 19 • The measured calculations are indirect since there is no validated instrument available to  
20 measure individuals' expenditure costs.  
21  
22  
23  
24  
25  
26  
27  
28  
29

### 30 31 **Introduction:** 32

33 In the last decade, there have been significant technological advances in healthcare.  
34  
35 Telemedicine is a modality of healthcare services delivery, where patients and providers are  
36 separated by distance. Telehealth uses information and communication technology for the  
37 exchange of information, related to the diagnosis and treatment of diseases and injuries, and to  
38 strengthen research and continuing education of health professionals (1). This care model can be  
39 especially helpful for outpatient consultations, where barriers related to travel time and cost are  
40 constantly inherent for patients (2,3).  
41  
42  
43  
44  
45  
46

47 Positive results regarding patient satisfaction and outcomes of telemedicine care have been  
48 reported in the literature (4). This tool has reduced costs in the health system of several countries  
49 (5,6). From the patient's perspective, despite its inherent limitations, telemedicine has been well-  
50 received and has generated excellent patient satisfaction (6,7). Telemedicine led savings for  
51  
52  
53  
54  
55  
56  
57  
58  
59  
60

1  
2  
3 patients and their companions, mainly those related to care, including travel time, distance, and  
4 costs (8–10). However, most of the studies about patient savings related to telemedicine use had  
5 been conducted in high-income countries, providing information on the teleconsultation offered for  
6 a single state, locality, or city.  
7  
8  
9  
10

11 The development and enhancement of telemedicine in Colombia has been under discussion since  
12 2010. However, it wasn't until 2020, during the COVID-19 pandemic's public health emergency,  
13 that the government began to actively promote its utilization; this was driven by the enforcement  
14 of mandatory lockdown measures and the imperative to ensure continuous medical care. In this  
15 circumstance, Fundación Valle del Lili (FVL), a highly complex Colombian teaching hospital,  
16 quickly introduced a telemedicine service. Implementing this service encountered significant  
17 challenges, the availability of resources and the cultural resistance exhibited by patients toward  
18 this modality of attention (11). Our aim was to estimate the hypothetical transportation-related  
19 savings in time, distance, and costs assumed for the patients due to outpatient care by the FVL  
20 telemedicine program during April to December 2020.  
21  
22  
23  
24  
25  
26  
27  
28  
29  
30  
31  
32  
33  
34

## 35 **Methods:**

### 36 **Design and population:**

37 A retrospective study focused on the time and transportation cost savings experienced by the  
38 patients as a result of telemedicine interventions. Our study included patient who resided in  
39 Colombia and received outpatient teleconsultation through the FVL Telemedicine program  
40 between April and December 2020. We excluded patients residing in countries other than  
41 Colombia, as well as those lacking residence information or address details. The study population  
42 was categorized based on their place of residence into the following three groups (Figure 1):  
43  
44  
45  
46  
47  
48  
49  
50

- 51 - Cali: People who live in the city of Cali, Valle del Cauca.
- 52  
53 - Valle del Cauca excluding Cali: people who live in other cities in Valle del Cauca,  
54 different to Cali.  
55  
56  
57  
58  
59  
60

- 1  
2  
3 - Outside of Valle del Cauca: people who live in other departments, different to Valle del  
4  
5 Cauca.  
6  
7  
8  
9  
10

11 Grey shaded area refers to the region of Valle del Cauca. Black point indicates Fundación Valle del Lili  
12 (FVL). Grey points represent areas of teleconsultation in Cali, Valle del Cauca excluding Cali, and areas  
13 outside of Valle del Cauca  
14  
15

16  
17 **Figure 1.** Study area map with locations of patient residences.  
18  
19

### 20 21 **Overview of Fundación Valle del Lili Telemedicine Program:** 22

23 In Colombia, hospitals are categorized into four levels based on their degree of specialization,  
24 subject to evaluation and approval by the national government. Level I hospitals primarily have  
25 low-complexity technology and provide care by general practitioners, offering outpatient  
26 consultations, hospitalization, emergency services, and essential diagnostic and treatment  
27 support. Level II hospitals expand their services to include gynecology and obstetrics, surgery,  
28 internal medicine, and pediatrics, incorporating technology of moderate complexity. Level III  
29 hospitals feature subspecialized personnel, adult and neonatal intensive care units, and advanced  
30 technology. At the highest level of care, Level IV hospitals cater to patients in critical condition,  
31 offering highly complex subspecialties and the potential for organ transplantation (12).  
32  
33

34 Moreover, it is noteworthy that the 3 largest cities in Colombia, Bogotá, Medellín, and Cali,  
35 concentrate the majority of Level III and IV hospitals in the country, providing comprehensive  
36 medical services to the surrounding population. Additionally, Colombia boasts only 16  
37 government-accredited teaching hospitals, representing hubs of specialist concentration. Access  
38 to specialist care in Colombia's healthcare system requires authorization from the patient's  
39 healthcare plan, as patients cannot freely choose their own specialist. The patient healthcare plan  
40 assigns the care location based on contractual agreements, with telemedicine services typically  
41  
42  
43  
44  
45  
46  
47  
48  
49  
50  
51  
52  
53  
54  
55  
56  
57

1  
2  
3 included within the health plan. Conversely, smaller cities and towns may house Level 1 and 2  
4  
5 hospitals, offering care of basic to moderate complexity (12).  
6  
7

8  
9 Fundación Valle del Lili (FVL) is a private, non-profit, high-complexity hospital located in Santiago  
10 de Cali, serving as a referral center in the southwest region of Colombia. In 2019 the institution  
11 provided 511,124 outpatient visits, 75,890 ER visits and 26,878 inpatient stays. FVL's  
12 telemedicine service, promoted and strengthened in March 2020 in response to the declaration of  
13 a health emergency by COVID-19 by the Ministry of Health, ensures the continuity of ambulatory  
14 health services throughout the Colombian territory. This initiative aims to address accessibility  
15 challenges, particularly in rural regions, by extending high-level medical services to remote areas.  
16 Through a robust referral and counter-referral mechanism, eligible patients requiring outpatient or  
17 home-based management can access specialized consultations, facilitating consultation  
18 scheduling and ensuring necessary care irrespective of geographic location.  
19  
20  
21  
22  
23  
24  
25  
26  
27  
28  
29  
30

31  
32 FVL's telemedicine service facilitates outpatient care across 64 medical specialties, employing an  
33 interactive modality that establishes remote communication between patients and healthcare  
34 professionals through real-time video calls. FVL's telemedicine service is meticulously organized  
35 to ensure seamless access to outpatient care for patients. The process begins with appointment  
36 scheduling via telephone, available from Monday to Friday between 7 a.m. and 5 p.m., and on  
37 Saturdays from 8 a.m. to 1 p.m. Patients are carefully guided through administrative procedures,  
38 supplemented by instructional emails detailing telemedicine processes. Appointment  
39 confirmations are diligently conducted 24 hours in advance by verifying the submission of requisite  
40 documents to the designated email address. Teleconsultations and real-time video calls are  
41 facilitated through the Microsoft Teams platform. Patient data is recorded in the Enterprise  
42 Resource Planning systems of the hospital (SAP-IS-H Software), which host the electronic  
43 medical record. Following the consultation, a PDF containing consultation details, medical  
44  
45  
46  
47  
48  
49  
50  
51  
52  
53  
54  
55  
56  
57  
58  
59  
60

1  
2  
3 directives, and prescriptions is dispatched to the patient's email address. Patients who have  
4 difficulty due to low technology literacy or cognitive issues are assisted by the appointment agent  
5 during the booking process. Additionally, the receptionist provides support during the  
6 teleconsultation setup, including guidance on using the application for initiating the call.  
7  
8  
9  
10

### 11 12 13 **Outcome measures:**

14  
15 The following outcome measures were taken into consideration:  
16

- 17  
18 a) Travel distance savings: The distance in kilometer of round-trip that the patient would  
19 have traveled for an in-person consultation at the FVL.  
20  
21  
22 b) Travel time savings: The time in hours of round-trip that the patient would have wasted  
23 for an in-person consultation at the FVL; it represents the patient work time loss due to  
24 the travel for an in-person consultation.  
25  
26 Measurements of car transportation were performed using Google Maps, taking the  
27 main FVL center as the destination and the patient's place of residence as the origin.  
28 The patient's home address was defined by the address (for Cali residents) or the  
29 registered municipality of residence in the electronic medical record system. The car  
30 transport option and the quickest route were selected. The estimated distance and  
31 travel time were doubled to encompass the round-trip travel to and from the FVL.  
32  
33  
34  
35  
36  
37  
38  
39  
40  
41 c) Travel cost savings: The expenses related to round-trip that the patient would have  
42 spent for an in-person consultation at the FVL. For all cases, two modes of  
43 transportation were considered: 1) private transportation, for which round-trip fuel  
44 expenses were calculated for; and 2) public transportation, for which taxi costs (Cali  
45 group) or intermunicipal bus costs (Valle del Cauca and Colombia groups) were  
46 calculated based on 2020 fare rates.  
47  
48  
49  
50  
51  
52  
53  
54  
55  
56  
57  
58  
59  
60

Fuel cost calculation: We took as a reference the cost per gallon of fuel reported by the Ministry of Mines and Energy for the year 2020 that was \$8 268 COP (\$2.24 USD); and an average consumption of 40 km traveled per gallon.

$$\text{Fuel cost saved} = \frac{\text{Round trip distance (km)}}{40 \text{ (km)}} * \$ 8\,268$$

Calculation of public transportation cost savings: To calculate the cost public transportation for the population living in Cali, we considered the cab fare reported by the Cali Municipal Hall for the year 2020, which was \$84 COP for each 80 meters traveled. For residents in other areas of Valle del Cauca and Colombia, we searched on the virtual platforms of the country's public transportation terminals to determine the fare cost of inter-municipal bus travel from the different localities to the city of Cali.

It should be highlighted that for the municipalities where river transportation is necessary, the travel cost and time required for each municipality were consulted, in addition to the cost and time of land transportation. For the municipalities that do not have land access, estimates were made of the airfare costs, these were excluded in the calculations of distance and time savings.

- d) Potential loss of productivity: It pertains to the value of work time that the patient would have lost due to the round-trip travel required for in-person consultations.

Calculation of the potential loss of productivity: In Colombia the legal minimum wage in force for the year 2020 was \$877 803 COP (\$640.31 USD), the workday corresponds to 48 hours per week, which is adjusted to 8 hours per day. The value of 1 hour worked was \$3 657 COP (\$2.67 USD). With the above, the value that the patient would have lost due to lost work time secondary to the round-trip to attend an in-person consultation was calculated.

$$\text{Work cost of time saved} = \text{Round trip time (hour)} * \$ 3\,657 \text{ COP}$$

1  
2  
3 All costs were calculated with the Purchasing Power Parity Exchange rate of 1 370.9 COP per  
4 USD as per CCEMG–EPPI Centre Cost Converter' (v.1.7 last update: January 2024)  
5 (https://epi.ioe.ac.uk/costconversion/) designed to facilitate international comparison of costs.  
6  
7  
8  
9 (13).  
10

11  
12  
13 To estimate distance per-patient-per-trip for patients outside the city of Cali but with land access  
14 to the city we used the distance between the center of the town and the exact address at  
15 Fundación Valle del Lili using available free software. For patients without land access distance  
16 was not computed. For patients in the city of Cali, an exact street address to street address  
17 estimation was done with the help of specialized software that takes into account traffic and real  
18 routes. This however was costly to do for the 19630 patients, so we estimated a sample of 753  
19 using the formula for a minimum sample size for estimating a population mean with 95% level of  
20 confidence (parameter = 1.96), a standard deviation of 7 km and a margin of error ( E ) of 0.5  
21 km. This calculation did not correct for the finite population correction factor as the population size  
22 was large relative to the sample size An extra 8% of patients were added to complete a sample  
23 of 814, allowed by the budget allocated to this task, increasing precision and accuracy. This  
24 resulted in a total of 1 708 teleconsultations in the selected sample, indicating that a single  
25 individual may have undergone multiple consultations and follow-up appointments throughout the  
26 study period. These consultations represented 3.9% of the 44,182 teleconsultations conducted in  
27 this group. As a result, calculations for the total savings in this group were later extrapolated by  
28 multiplying the value obtained in the sample by 25.87.  
29  
30  
31  
32  
33  
34  
35  
36  
37  
38  
39  
40  
41  
42  
43  
44  
45  
46  
47  
48

## 49 **Ethics Approval**

50  
51 This study was conducted according to the Declaration of Helsinki guidelines; and was classified  
52 as a risk-free study according to resolution No. 008430 of 1993, article 11, numeral A of the  
53 Ministry of Health and Social Protection of Colombia. The institutional ethics committee reviewed  
54  
55  
56  
57



and approved the protocol (Protocol No. 1742; IRB/EC No. 090 – 2021, Act No. 06 - 2021). This study did not require intervention or intentional modification of the biological, physiological, psychological, or social variables of the participants. Therefore, no informed consent was necessary.

### Patient and Public Involvement

None

### Results

A total of 296 170 outpatient care consultations were made from April to December 2020. Among these, 152 consultations were excluded due to patients residing outside of Colombia. Consequently, 296 018 consultations were included, out of which 62 258 (21.03%) were conducted via telemedicine, involving to 27 948 individuals (**Supplementary Table 1**). The median age of the population was 41 years (IQR 21-61), the majority were female (62.95%), and the median of teleconsultations per person were 1 (IQR 1-2) (**Table 1**). Further details regarding the distribution of the number of teleconsultations per patient can be observed in (**Figure 2**). Telemedicine services were primarily provided by Psychiatry (8 891, 14.28%), Endocrinology (6 088, 9.78%), and Psychology (4 603, 7.39%).

**Table 1.** Sociodemographic characteristics of the patients attended via telemedicine, between April and December 2020.

| Variable                     | Total          | Cali           | Valle del Cauca<br>excluding Cali | Outside of Valle<br>del Cauca |
|------------------------------|----------------|----------------|-----------------------------------|-------------------------------|
| <b>Age, median<br/>(IQR)</b> | 41 (21 - 61)   | 41 (22 - 61)   | 42 (19 - 61)                      | 41 (17 - 60.5)                |
| <b>Sex</b>                   |                |                |                                   |                               |
| Female                       | 17 594 (62.95) | 12 462 (63.48) | 3 573 (62.65)                     | 1 552 (59.58)                 |
| Male                         | 10 354 (37.05) | 7 168 (36.52)  | 2 130 (37.35)                     | 1 053 (40.42)                 |

| <b>Number of teleconsultations per patient</b> |                |                |               |               |
|------------------------------------------------|----------------|----------------|---------------|---------------|
| 1 - 2                                          | 22 136 (79.23) | 15 574 (79.34) | 4 499 (78.89) | 2 063 (79.19) |
| 3 - 5                                          | 4 100 (14.68)  | 2 817 (14.35)  | 870 (15.26)   | 413 (15.85)   |
| 6 - 10                                         | 1 078 (3.86)   | 783 (3.99)     | 198 (3.47)    | 97 (3.72)     |
| >10                                            | 624 (2.23)     | 456 (2.32)     | 136 (2.38)    | 32 (1.23)     |

**Figure 2.** Distribution of the frequency of teleconsultations per person.

Total travel savings in terms of distance amounted to 4 514 903 kilometers, and in terms of time, it reached 132 886 hours. The estimated travel cost savings were \$1 035 363 USD for private transportation (combining fuel cost savings and potential productivity gains) and \$ 1 442 363 USD for public transportation (cost of public transportation saved and potential productivity gains). The largest savings were in the rest of Colombia group, which are those people living in departments of Colombia other than Valle del Cauca. Table 2 shows the total and average savings per teleconsultation for each group. Furthermore, it was estimated that individuals residing in areas where access can only be achieved by air, a savings of \$134 USD (SD 131.17) per teleconsultation.

**Table 2.** Distance, time, fuel, and public transportation savings observed by telemedicine consultation, between April and December 2020.

| <b>Variable</b> | <b>Total</b> | <b>Cali</b> | <b>Valle del Cauca<br/>excluding Cali</b> | <b>Outside of<br/>Valle del<br/>Cauca</b> |
|-----------------|--------------|-------------|-------------------------------------------|-------------------------------------------|
|                 | n=62,258     | n=44,182    | n=12,707                                  | n=5,369                                   |

|                                                                                          |                        |                        |                         |                        |
|------------------------------------------------------------------------------------------|------------------------|------------------------|-------------------------|------------------------|
| Number of patients<br>attended by telemedicine                                           | 27,948                 | 19,630                 | 5,703                   | 2,615                  |
| <b>Round-trip distance saved (km)</b>                                                    |                        |                        |                         |                        |
| Total                                                                                    | 4,514,903              | 644,758                | 1,295,538               | 2,574,607              |
| Mean (SD)                                                                                | 72.55 (190)            | 14.60 (9.44)           | 101.95 (82.88)          | 481.15 (454.02)        |
| Median (IQR)                                                                             | 20.80(8.6 -33.4)       | 11.60 (6 - 23.6)       | 76.40 (30.40 -<br>149)  | 328 (258 - 750)        |
| <b>Round-trip time saved (hours)</b>                                                     |                        |                        |                         |                        |
| Total                                                                                    | 132,886                | 43,461                 | 34,127                  | 55,298                 |
| Mean (SD)                                                                                | 1.80 (7.02)            | 0.98 (0.35)            | 2.69 (1.43)             | 10.33 (22.11)          |
| Median (IQR)                                                                             | 0.93 (0.43 -<br>1.27)  | 0.90 (0.67 -<br>1.27)  | 2.40 (1.33 - 3.17)      | 6.73 (5.63 -<br>17.0)  |
| <b>Potential loss of productivity (USD)</b>                                              |                        |                        |                         |                        |
| Total                                                                                    | 354,514                | 115,963                | 91,049                  | 147,533                |
| Mean (SD)                                                                                | 5.70 (18.73)           | 2.62 (0.92)            | 7.17 (3.82)             | 27.6 (59.0)            |
| Median (IQR)                                                                             | 3.39 (2.04 -<br>4.26)  | 2.40 (1.78 -<br>3.38)  | 6.40 (3.56 - 8.45)      | 18.0 (15.0 -<br>45.4)  |
| <b>Total fuel cost saved (USD)</b>                                                       |                        |                        |                         |                        |
| Total                                                                                    | 680,849                | 97,294                 | 195,337                 | 388,191                |
| Mean (SD)                                                                                | 10.94 (28.64)          | 2.20 (1.42)            | 15.37 (12.50)           | 72.5 (68.5)            |
| Median (IQR)                                                                             | 3.15 (1.30 -<br>5.05)  | 1.75 (0.90 -<br>3.56)  | 11.52 (4.58 -<br>22.47) | 49.5 (38.9 -<br>113.1) |
| <b>Total cost of public transportation saved* (USD)</b>                                  |                        |                        |                         |                        |
| Total                                                                                    | 1,087,849              | 494,237                | 185,582                 | 408,002                |
| Mean (SD)                                                                                | 17.48 (29.69)          | 11.19 (7.23)           | 14.60 (13.81)           | 76.2 (74.6)            |
| Median (IQR)                                                                             | 8.88 (5.84 -<br>19.76) | 8.88 (4.60 -<br>18.08) | 7.29 (5.84 -<br>21.25)) | 43,8 (40,8 -<br>109,4) |
| <b>Saved transportation costs for municipalities with exclusively air income (USD) *</b> |                        |                        |                         |                        |

|              |    |    |    |                             |
|--------------|----|----|----|-----------------------------|
| Total        | NA | NA | NA | 6,170                       |
| Mean (SD)    | NA | NA | NA | 362.92<br>(356.05)          |
| Median (IQR) | NA | NA | NA | 265.51 (265.51<br>- 496.03) |

\* Refers to teleconsultations from people living in areas with no land access: Guapi (Cauca), Timbiquí (Cauca), Leticia (Amazonas), San Andres (San Andres y Providencia).

NA: Not apply.

The mean number of teleconsultations per patient was 2.10 (SD2.54) in Cali, 2.23 (SD 3.14) in Valle del Cauca excluding Cali, and 2.05 (SD 2.28) for the Outside of Valle del Cauca group. The estimated mean cost savings for private transportation round-trip per patient was \$10.13 USD in Cali, \$66.79 USD in Valle del Cauca excluding Cali, and \$205.65 USD in outside of Valle del Cauca; and mean cost savings for public transportation expenses per patient was \$28.98 USD in Cali, \$50.22 USD in Valle del Cauca excluding Cali, and \$213.25USD in outside of Valle del Cauca . In addition, the transportation cost savings for individuals residing in areas with exclusive air access amounted to \$658.52 USD, with a standard deviation of \$392.49. **(Table 3).**

**Table 3.** Distance, time, fuel, and public transportation per patient (all visits), between April and December 2020.

| Variable                                    | Cali               | Valle del Cauca           | Outside of Valle     |
|---------------------------------------------|--------------------|---------------------------|----------------------|
|                                             | N=19,630<br>n= 814 | excluding Cali<br>N=5,703 | del Cauca<br>N=2,615 |
| Teleconsultations per patient,<br>mean (SD) | 2.10 (2.54)        | 2.23 (3.14)               | 2.05 (2.28)          |

|                                                                                                   |               |                 |                  |
|---------------------------------------------------------------------------------------------------|---------------|-----------------|------------------|
| Distance saved per patient (km),<br>mean (SD)                                                     | 30.64 (52.80) | 227.17 (398.38) | 988.33 (1556.41) |
| Time saved per patients (hours),<br>mean (SD)                                                     | 2.06 (2.90)   | 5.98 (9.26)     | 21.23 (51.47)    |
| Potential loss of productivity<br>(USD), mean (SD)                                                | 5.51 (7.75)   | 34.25 (60.7)    | 56.63 (137.33)   |
| Fuel cost saved per patient<br>(USD), mean (SD)                                                   | 4.62 (7.96)   | 32.54 (65.51)   | 149.02 (234.67)  |
| Cost of public transportation<br>saved* (USD), mean (SD)                                          | 23.47 (40.44) | 15.97 (24.70)   | 156.62 (251.04)  |
| Saved transportation costs for<br>municipalities with exclusively air<br>income (USD)*, mean (SD) | NA            | NA              | 658.52 (392.49)  |

\* Refers to teleconsultations from people living in areas with no land access: Guapi (Cauca), Timbiquí (Cauca), Leticia (Amazonas), San Andres (San Andres y Providencia).

NA: Not apply.

## Discussion:

In LMIC, the population at the base of the socioeconomic pyramid bears a disproportionately high burden of disease, often facing limited access to health services due to lower purchasing power and residence in underserved areas. In such contexts, there is an urgent need to identify innovative short-, medium-, and long-term to achieve effective universal health coverage, giving special strength to programs that allow access in the most remote and vulnerable areas (14,15). Strengthening telehealth systems has the potential to improve health and socioeconomic status of different population groups. Extending healthcare services to these remote areas through

1  
2  
3 telemedicine helps bridge this gap and facilitates substantial reductions in both time and distance  
4 (16–19). In Colombia, 7.2% of the population lives in rural areas (20), with significant challenges  
5 and obstacles when accessing healthcare services, particularly specialized medical care (15).  
6  
7  
8  
9

10  
11 In 2020, as the COVID-19 pandemic spread worldwide, world poverty increased, and poverty  
12 induced by COVID-19 (21). Colombia was significantly affected by this issue, with a noticeable  
13 deterioration in its economic growth indicators. In 2020, the pandemic led to a 6.8% decline in  
14 Colombia's economy (Gross Domestic Product (GDP)), contributing to an increase in the national  
15 unemployment rate by at least 8 percentage points, resulting in an average rate of 15.9, a 5.4  
16 percentage points rise from the previous year (22,23). Furthermore, the proportion of informal  
17 employment increased from 45% to 49% (24). Thus, savings achieved by the program were very  
18 timely in the midst of the worst economic year in Colombian history. The introduction of  
19 telemedicine led to average Potential loss of productivity savings of \$5.51 and \$34.25 USD per  
20 patient for the population of Cali and Valle del Cauca, equivalent to 26% and 75% of a full day's  
21 salary, respectively. For the population of Colombia, \$56.63 USD was saved per patient,  
22 representing 9% of the minimum monthly salary.  
23  
24  
25  
26  
27  
28  
29  
30  
31  
32  
33  
34  
35  
36  
37  
38

39 Transportation cost is a determining factor in access to health care, especially for those living in  
40 rural areas not having a tertiary or complex center nearby that can provide services by medical  
41 specialties (25). However, the need for more training in the use of technologies and the difficulties  
42 in acquiring technology that allows remote connection limits the implementation of telemedicine in  
43 these areas (6,26). In our study, the telemedicine program succeeded in extending its reach to  
44 remote locations facing geographical challenges. These areas are accessible solely by air or sea.  
45 Examples include municipalities such as Guapi, Timbiquí, Leticia, and San Andres Island.  
46  
47  
48  
49  
50  
51  
52  
53  
54  
55  
56  
57  
58  
59  
60

1  
2  
3 distance, and travel expenses for their residents (27). For people living in those municipalities  
4 savings in transportation costs estimated per patient exceeded the 2020 monthly minimum wage.  
5  
6  
7

8  
9 Significant savings related to transportation and fuel expenses have been reported. These costs  
10 vary widely; studies have reported savings ranging from \$4.66 to \$150 per teleconsultation (4,28).  
11  
12 Other studies have reported saved costs that encompass fuel expenses, insurance, and  
13 maintenance, resulting in higher per-person savings. Few studies have addressed costs related  
14 to public transportation; given the importance of public transportation in Colombia, especially  
15 between and within cities, this variable was key for a more realistic measurement (29). When  
16 comparing the average public transportation expenses saved for the Cali, Valle del Cauca, and  
17 rest of Colombia locations to the legal monthly minimum salary in Colombia for year 2020, it  
18 represents 3.67%, 5.08%, and 24.19%, respectively for the average patient.  
19  
20  
21  
22  
23  
24  
25  
26  
27  
28  
29

30 Limitations of the current study include the retrospective approach to data collection, which limited  
31 the depth of analysis possible. Prospective data collection would have allowed for a more  
32 comprehensive examination, including factors such as work absenteeism, wait times, appointment  
33 duration, and associated costs. In addition, the absence of provider expenditures in the cost-  
34 effectiveness assessment of telemedicine represents a significant gap. On the other hand, the  
35 Colombian healthcare system fully covers diagnostic and treatment services, which may mitigate  
36 the cost impact on patients or hospitals. However, the study did not measure these consequences  
37 and costs, which is a limitation. Additionally, the potential loss of productivity particularly affects  
38 the adult population aged between 21 and 61 years. The retirement age in Colombia for women  
39 is 57 years and for men is 62 years. Within the scope of the study, this constitutes a limitation as  
40 it was not measured.  
41  
42  
43  
44  
45  
46  
47  
48  
49  
50  
51  
52

53 The study also overlooked critical factors like internet usage and telecommunications connectivity,  
54 impacting the assessment of cost savings achieved through telemedicine adoption. Failure to  
55  
56  
57

1  
2  
3 consider participants' transportation mode and employment status hindered insights into  
4 socioeconomic dynamics influencing telemedicine utilization. Methodologically, the indirect  
5 calculation of expenditures introduced ambiguity, compounded by the absence of a validated  
6 instrument for precise measurement. Our objective in this paper was measuring savings using TM  
7 in comparison to a regular visit by the patient to our location, we did not seek a full economic  
8 evaluation which will include a cost-effectiveness (CE) study. The CE literature has shown that  
9 from a health systems perspective telemedicine programs remain cost-effective, but from a  
10 societal perspective there is a gap, and we leave a full economic evaluation for further research.  
11  
12  
13  
14  
15  
16  
17  
18  
19  
20  
21

### 22 **Future implications**

23  
24 The results encourage developing public policies and strengthening strategies incorporating digital  
25 health and telemedicine in Latin America's countries. Our experience shows results aimed at  
26 reducing indirect patient costs related to providing health services and facilitating care by multiple  
27 specialties through teleconsultation.  
28  
29  
30  
31  
32  
33  
34

### 35 **Conclusion:**

36  
37 Telemedicine brings to patients a significant travel savings, both in terms of time, distance, cost  
38 and potential loss of productivity; particularly in regions facing geographical and socioeconomic  
39 challenges. These findings emphasize the potential of telemedicine to bridge healthcare  
40 accessibility gaps in middle-income countries and the need to further develop and expand  
41 telemedicine services in such areas.  
42  
43  
44  
45  
46

### 47 **Funding**

48  
49 This research received no specific grant from any funding agency in the public, commercial or not-  
50 for-profit sectors.  
51  
52  
53  
54

### 55 **Conflicts of Interest**



1  
2  
3 The authors report there are no competing interests to declare.  
4  
5  
6

### 7 **Data availability statement**

8  
9 The data that support the findings of this study are available from the corresponding author [MFE],  
10 upon reasonable request.  
11  
12

### 13 **Acknowledgements**

14  
15 We thank to the Fundación Valle del Lili, especially the department of cost and budget for providing  
16 and supporting this current research.  
17  
18  
19  
20  
21

### 22 **Author contributions**

23  
24 SIP and MFE designed and supervised the study; JJT and JA contributed to data collection; SIP,  
25 JJT, EEP and LLP contributed data analysis; SIP, MFE, EEP, LLP and JA contributed to literature  
26 review; EEP, LLP, JA, SIP and MFE contributed to drafted the manuscript. All authors read drafts  
27 of the manuscript and approved the final version  
28  
29  
30  
31  
32  
33  
34

### 35 **References:**

- 36  
37 1. World Health Organization, International Telecommunication Union. WHO-ITU global  
38 standard for accessibility of telehealth services. En Geneva; 2022 [citado 28 de abril de 2023].  
39 Disponible en: <https://www.who.int/publications-detail-redirect/9789240050464>  
40  
41  
42  
43 2. Bynum AB, Irwin CA, Cranford CO, Denny GS. The impact of telemedicine on patients' cost  
44 savings: some preliminary findings. *Telemed J E Health*. 2003;9(4):361-7.  
45  
46  
47 3. Spaulding R, Belz N, DeLurgio S, Williams AR. Cost savings of telemedicine utilization for  
48 child psychiatry in a rural Kansas community. *Telemed J E Health*. octubre de 2010;16(8):867-  
49  
50  
51 71.  
52  
53  
54  
55  
56  
57  
58  
59  
60

- 1  
2  
3 4. Dullet NW, Geraghty EM, Kaufman T, Kissee JL, King J, Dharmar M, et al. Impact of a  
4  
5 University-Based Outpatient Telemedicine Program on Time Savings, Travel Costs, and  
6  
7 Environmental Pollutants. *Value Health*. abril de 2017;20(4):542-6.  
8
- 9 5. Snoswell CL, Taylor ML, Comans TA, Smith AC, Gray LC, Caffery LJ. Determining if  
10  
11 Telehealth Can Reduce Health System Costs: Scoping Review. *J Med Internet Res*. 19 de  
12  
13 octubre de 2020;22(10):e17298.  
14
- 15 6. Almathami HKY, Win KT, Vlahu-Gjorgievska E. Barriers and Facilitators That Influence  
16  
17 Telemedicine-Based, Real-Time, Online Consultation at Patients' Homes: Systematic  
18  
19 Literature Review. *J Med Internet Res*. 20 de febrero de 2020;22(2):e16407.  
20
- 21 7. Eze ND, Mateus C, Hashiguchi TCO. Telemedicine in the OECD: An umbrella review of  
22  
23 clinical and cost-effectiveness, patient experience and implementation. *PLOS ONE*. 13 de  
24  
25 agosto de 2020;15(8):e0237585.  
26
- 27 8. Hussaini SMQ, Gupta A, Dusetzina SB. Financial Toxicity of Cancer Treatment. *JAMA*  
28  
29 *Oncology*. 1 de mayo de 2022;8(5):788.  
30
- 31 9. Tuckson RV, Edmunds M, Hodgkins ML. Telehealth. *N Engl J Med*. 19 de octubre de  
32  
33 2017;377(16):1585-92.  
34
- 35 10. Patel KB, Turner K, Alishahi Tabriz A, Gonzalez BD, Oswald LB, Nguyen OT, et al. Estimated  
36  
37 Indirect Cost Savings of Using Telehealth Among Nonelderly Patients With Cancer. *JAMA*  
38  
39 *Network Open*. 10 de enero de 2023;6(1):e2250211.  
40
- 41 11. Luis Mauricio Figueroa. Telehealth in Colombia, challenges associated with COVID-19. 12 de  
42  
43 noviembre de 2020;40(2):77-9.  
44
- 45 12. Escobar MF, Echavarría MP, Carvajal JA, Lesmes MC, Porrás AM, Mesa V, Ávila-Sánchez  
46  
47 FA, Gallego JC, Riascos NC, Hurtado D, Fernández PA, Posada L, Hernández AM, Ramos I,  
48  
49 Irurita MI, Loaiza JS, Echeverri D, Gonzalez L, Peña-Zárate EE, Libreros-Peña L, Galindo JS,  
50  
51 Granados M. Hospital padrino: a collaborative strategy model to tackle maternal mortality: a  
52  
53  
54  
55  
56  
57  
58  
59  
60

- 1  
2  
3 mixed methods study in a middle-income region. *Lancet Reg Health Am.* 2024 Mar 1;31:100705.  
4  
5 doi: 10.1016/j.lana.2024.100705.  
6  
7
- 8 13. Shemilt I, James T, Marcello M. A web-based tool for adjusting costs to a specific target  
9  
10 currency and price year. *Evid Policy [Internet].* 2010;6(1) [citado 1 de septiembre 2023]:51–9.  
11  
12 Disponible en: <http://dx.doi.org/10.1332/174426410x482999>  
13
- 14 14. Departamento Administrativo Nacional de Estadística (DANE). Situación de las mujeres  
15  
16 rurales desde las estadísticas oficiales [Internet]. 2022 [citado 1 de septiembre de 2023].  
17  
18 Disponible en: [https://www.dane.gov.co/files/investigaciones/notas-estadisticas/oct-2022-](https://www.dane.gov.co/files/investigaciones/notas-estadisticas/oct-2022-nota-estadistica-mujer-rural-presentacion.pdf)  
19  
20 [nota-estadistica-mujer-rural-presentacion.pdf](https://www.dane.gov.co/files/investigaciones/notas-estadisticas/oct-2022-nota-estadistica-mujer-rural-presentacion.pdf)  
21
- 22 15. Brundisini F, Giacomini M, DeJean D, Vanstone M, Winsor S, Smith A. Chronic disease  
23  
24 patients' experiences with accessing health care in rural and remote areas: a systematic  
25  
26 review and qualitative meta-synthesis. *Ont Health Technol Assess Ser.* 2013;13(15):1-33.  
27  
28
- 29 16. Speyer R, Denman D, Wilkes-Gillan S, Chen YW, Bogaardt H, Kim JH, et al. Effects of  
30  
31 telehealth by allied health professionals and nurses in rural and remote areas: A systematic  
32  
33 review and meta-analysis. *Journal of Rehabilitation Medicine.* 2018;50(3):225-35.  
34
- 35 17. Carroll M, Cullen T, Ferguson S, Hogge N, Horton M, Kokesh J. Innovation in Indian  
36  
37 Healthcare: Using Health Information Technology to Achieve Health Equity for American  
38  
39 Indian and Alaska Native Populations. *Perspect Health Inf Manag.* 1 de enero de  
40  
41 2011;8(Winter):1d.  
42
- 43 18. Lagomarsino G, Garabrant A, Adyas A, Muga R, Otoo N. Moving towards universal health  
44  
45 coverage: health insurance reforms in nine developing countries in Africa and Asia. *Lancet.* 8  
46  
47 de septiembre de 2012;380(9845):933-43.  
48  
49
- 50 19. Balabanova D, Mills A, Conteh L, Akkazieva B, Banteyerga H, Dash U, et al. Good Health at  
51  
52 Low Cost 25 years on: lessons for the future of health systems strengthening. *Lancet.* 15 de  
53  
54 junio de 2013;381(9883):2118-33.  
55  
56  
57  
58  
59  
60

- 1  
2  
3 20. Dirección de Epidemiología y Demografía. Análisis de Situación de Salud (ASIS) Colombia,  
4 2020. Ministerio de Salud y Protección Social; 2020.  
5  
6
- 7 21. Moyer JD, Verhagen W, Mapes B, Bohl DK, Xiong Y, Yang V, et al. How many people is the  
8 COVID-19 pandemic pushing into poverty? A long-term forecast to 2050 with alternative  
9 scenarios. PLoS One. 8 de julio de 2022;17(7):e0270846.  
10  
11
- 12 22. Departamento Administrativo Nacional de Estadística (DANE). Comunicado de prensa  
13 Producto Interno Bruto (PIB) IV trimestre y año 2020. Bogotá D.C; 2021 feb p. 1-10.  
14  
15
- 16 23. Departamento Administrativo Nacional de Estadística (DANE). Boletín Técnico Gran  
17 Encuesta Integrada de Hogares (GEIH) Diciembre 2020 [Internet]. Bogotá D.C; 2021 ene  
18 [citado 1 de septiembre de 2023] p. 1-36. Disponible en:  
19 [https://www.dane.gov.co/files/investigaciones/boletines/ech/ech/bol\\_empleo\\_dic\\_20.pdf](https://www.dane.gov.co/files/investigaciones/boletines/ech/ech/bol_empleo_dic_20.pdf)  
20  
21  
22  
23  
24  
25
- 26 24. Departamento Administrativo Nacional de Estadísticas - DANE [Internet]. [citado 1 de  
27 septiembre de 2023]. Empleo informal y seguridad social. Disponible en:  
28 [https://www.dane.gov.co/index.php/estadisticas-por-tema/salud/informalidad-y-seguridad-](https://www.dane.gov.co/index.php/estadisticas-por-tema/salud/informalidad-y-seguridad-social/empleo-informal-y-seguridad-social-historicos)  
29 [social/empleo-informal-y-seguridad-social-historicos](https://www.dane.gov.co/index.php/estadisticas-por-tema/salud/informalidad-y-seguridad-social/empleo-informal-y-seguridad-social-historicos)  
30  
31  
32  
33  
34
- 35 25. Wolfe MK, McDonald NC, Holmes GM. Transportation Barriers to Health Care in the United  
36 States: Findings From the National Health Interview Survey, 1997-2017. Am J Public Health.  
37 junio de 2020;110(6):815-22.  
38  
39  
40
- 41 26. Zachrison KS, Boggs KM, Hayden EM, Espinola JA, Camargo CA. Understanding Barriers to  
42 Telemedicine Implementation in Rural Emergency Departments. Ann Emerg Med. marzo de  
43 2020;75(3):392-9.  
44  
45  
46
- 47 27. Atmojo JT, Widiyanto A, Ernawati E, Arradini D, Tri Sudaryanto, Wahyu. Telemedicine, Cost  
48 Effectiveness, and Patients Satisfaction: A Systematic Review. J HEALTH POLICY MANAGE.  
49 2020;5(2):103-7.  
50  
51  
52  
53  
54  
55  
56  
57  
58  
59  
60

- 1  
2  
3 28. Paquette S, Lin JC. Outpatient Telemedicine Program in Vascular Surgery Reduces Patient  
4 Travel Time, Cost, and Environmental Pollutant Emissions. Ann Vasc Surg. agosto de  
5 2019;59:167-72.  
6  
7  
8  
9 29. Ministerio de Transporte. Transporte en Cifras 2021. Anuario Nacional de Transporte. 12.a  
10 ed. 2022;55-8.  
11  
12  
13  
14  
15  
16  
17  
18  
19  
20  
21  
22  
23  
24  
25  
26  
27  
28  
29  
30  
31  
32  
33  
34  
35  
36  
37  
38  
39  
40  
41  
42  
43  
44  
45  
46  
47  
48  
49  
50  
51  
52  
53  
54  
55  
56  
57  
58  
59  
60

For peer review only

1  
2  
3  
4  
5  
6  
7  
8  
9  
10  
11  
12  
13  
14  
15  
16  
17  
18  
19  
20  
21  
22  
23  
24  
25  
26  
27  
28  
29  
30  
31  
32  
33  
34  
35  
36  
37  
38  
39  
40  
41  
42  
43  
44  
45  
46  
47  
48  
49  
50  
51  
52  
53  
54  
55  
56  
57  
58  
59  
60

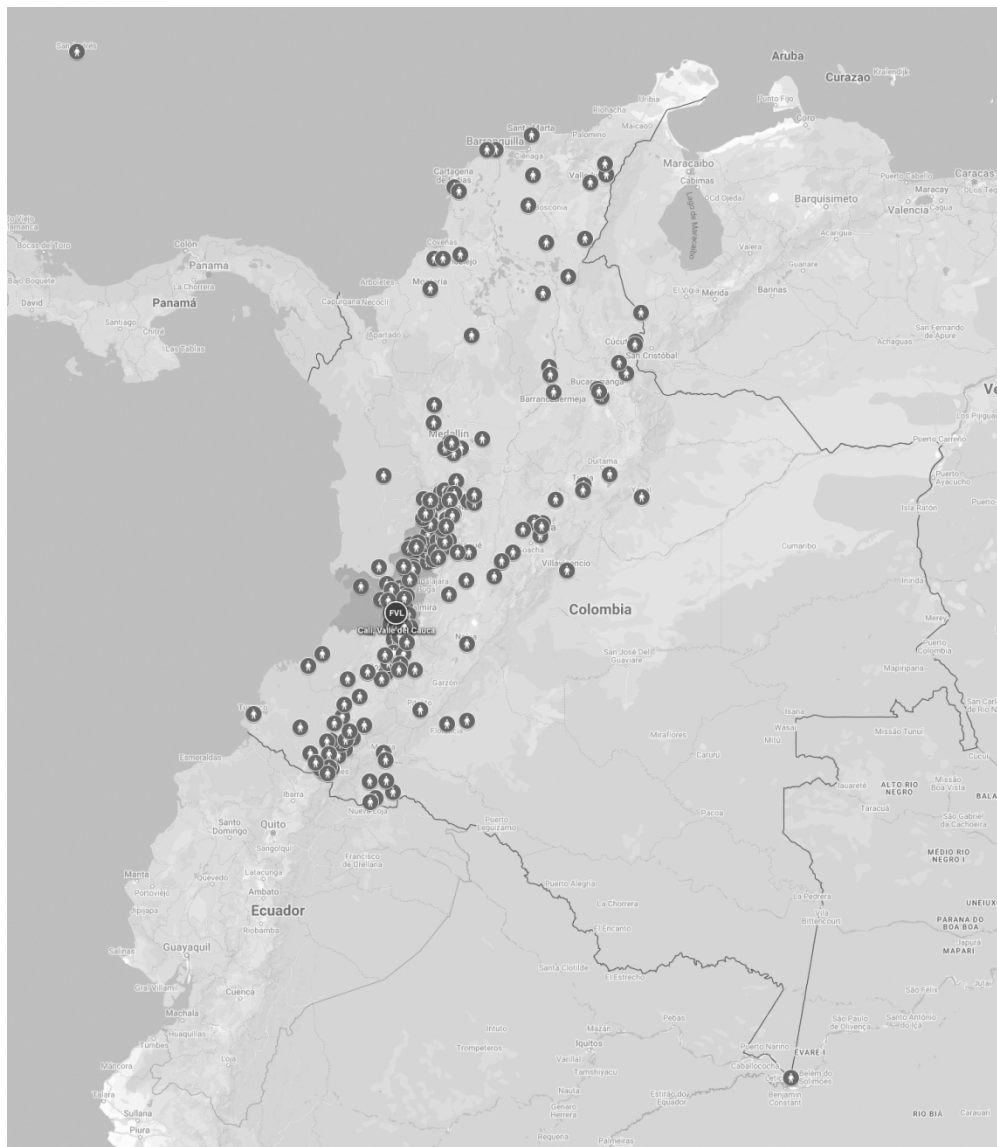

Grey shaded area refers to the region of Valle del Cauca. Black point indicates Fundación Valle del Lili (FVL). Grey points represent areas of teleconsultation in Cali, Valle del Cauca excluding Cali, and areas outside of Valle del Cauca

Figure 1. Study area map with locations of patient residences.

127x144mm (300 x 300 DPI)

1  
2  
3  
4  
5  
6  
7  
8  
9  
10  
11  
12  
13  
14  
15  
16  
17  
18  
19  
20  
21  
22  
23  
24  
25  
26  
27  
28  
29  
30  
31  
32  
33  
34  
35  
36  
37  
38  
39  
40  
41  
42  
43  
44  
45  
46  
47  
48  
49  
50  
51  
52  
53  
54  
55  
56  
57  
58  
59  
60



Figure 2. Distribution of the frequency of teleconsultations per person.

206x114mm (72 x 72 DPI)

**Supplementary Table 1.** Number of outpatient care provided per month according to modality of care, between April and December 2020.

| <b>Month</b> | <b>Telemedicine consultations</b> | <b>In-person consultations</b> |
|--------------|-----------------------------------|--------------------------------|
| April        | 4 181                             | 8 920                          |
| May          | 7 378                             | 13 674                         |
| June         | 7 770                             | 20 576                         |
| July         | 9 427                             | 25 897                         |
| August       | 8 117                             | 24 679                         |
| September    | 7 707                             | 33 305                         |
| October      | 6 521                             | 36 153                         |
| November     | 5 609                             | 36 094                         |
| December     | 5 548                             | 34 462                         |
| <b>Total</b> | <b>62 258</b>                     | <b>233 760</b>                 |



STROBE Statement—Checklist of items that should be included in reports of *cross-sectional studies*

|                              | Item No | Recommendation                                                                                                                                                                                               | Page No |
|------------------------------|---------|--------------------------------------------------------------------------------------------------------------------------------------------------------------------------------------------------------------|---------|
| <b>Title and abstract</b>    | 1       | (a) Indicate the study's design with a commonly used term in the title or the abstract                                                                                                                       | 1       |
|                              |         | (b) Provide in the abstract an informative and balanced summary of what was done and what was found                                                                                                          | 2-3     |
| <b>Introduction</b>          |         |                                                                                                                                                                                                              |         |
| Background/rationale         | 2       | Explain the scientific background and rationale for the investigation being reported                                                                                                                         | 3-4     |
| Objectives                   | 3       | State specific objectives, including any prespecified hypotheses                                                                                                                                             | 4       |
| <b>Methods</b>               |         |                                                                                                                                                                                                              |         |
| Study design                 | 4       | Present key elements of study design early in the paper                                                                                                                                                      | 4-5     |
| Setting                      | 5       | Describe the setting, locations, and relevant dates, including periods of recruitment, exposure, follow-up, and data collection                                                                              | 4-5     |
| Participants                 | 6       | (a) Give the eligibility criteria, and the sources and methods of selection of participants                                                                                                                  | 4-5     |
| Variables                    | 7       | Clearly define all outcomes, exposures, predictors, potential confounders, and effect modifiers. Give diagnostic criteria, if applicable                                                                     | 5-6     |
| Data sources/<br>measurement | 8*      | For each variable of interest, give sources of data and details of methods of assessment (measurement). Describe comparability of assessment methods if there is more than one group                         | 6-7     |
| Bias                         | 9       | Describe any efforts to address potential sources of bias                                                                                                                                                    | 6-7     |
| Study size                   | 10      | Explain how the study size was arrived at                                                                                                                                                                    | 4-5     |
| Quantitative variables       | 11      | Explain how quantitative variables were handled in the analyses. If applicable, describe which groupings were chosen and why                                                                                 | 6-7     |
| Statistical methods          | 12      | (a) Describe all statistical methods, including those used to control for confounding                                                                                                                        | 5-7     |
|                              |         | (b) Describe any methods used to examine subgroups and interactions                                                                                                                                          | 4-7     |
|                              |         | (c) Explain how missing data were addressed                                                                                                                                                                  | NA      |
|                              |         | (d) If applicable, describe analytical methods taking account of sampling strategy                                                                                                                           | 4-5     |
|                              |         | (e) Describe any sensitivity analyses                                                                                                                                                                        | NA      |
| <b>Results</b>               |         |                                                                                                                                                                                                              |         |
| Participants                 | 13*     | (a) Report numbers of individuals at each stage of study—eg numbers potentially eligible, examined for eligibility, confirmed eligible, included in the study, completing follow-up, and analysed            | 8-12    |
|                              |         | (b) Give reasons for non-participation at each stage                                                                                                                                                         | NA      |
|                              |         | (c) Consider use of a flow diagram                                                                                                                                                                           | NA      |
| Descriptive data             | 14*     | (a) Give characteristics of study participants (eg demographic, clinical, social) and information on exposures and potential confounders                                                                     | 8-12    |
|                              |         | (b) Indicate number of participants with missing data for each variable of interest                                                                                                                          | NA      |
| Outcome data                 | 15*     | Report numbers of outcome events or summary measures                                                                                                                                                         | 8-12    |
| Main results                 | 16      | (a) Give unadjusted estimates and, if applicable, confounder-adjusted estimates and their precision (eg, 95% confidence interval). Make clear which confounders were adjusted for and why they were included | 8-12    |

|                          |    |                                                                                                                                                                            |       |
|--------------------------|----|----------------------------------------------------------------------------------------------------------------------------------------------------------------------------|-------|
|                          |    | (b) Report category boundaries when continuous variables were categorized                                                                                                  | 8-12  |
|                          |    | (c) If relevant, consider translating estimates of relative risk into absolute risk for a meaningful time period                                                           | NA    |
| Other analyses           | 17 | Report other analyses done—eg analyses of subgroups and interactions, and sensitivity analyses                                                                             | 8-12  |
| <b>Discussion</b>        |    |                                                                                                                                                                            |       |
| Key results              | 18 | Summarise key results with reference to study objectives                                                                                                                   | 12-14 |
| Limitations              | 19 | Discuss limitations of the study, taking into account sources of potential bias or imprecision. Discuss both direction and magnitude of any potential bias                 | 14    |
| Interpretation           | 20 | Give a cautious overall interpretation of results considering objectives, limitations, multiplicity of analyses, results from similar studies, and other relevant evidence | 12-15 |
| Generalisability         | 21 | Discuss the generalisability (external validity) of the study results                                                                                                      | 13-15 |
| <b>Other information</b> |    |                                                                                                                                                                            |       |
| Funding                  | 22 | Give the source of funding and the role of the funders for the present study and, if applicable, for the original study on which the present article is based              | 15    |

\*Give information separately for exposed and unexposed groups.

**Note:** An Explanation and Elaboration article discusses each checklist item and gives methodological background and published examples of transparent reporting. The STROBE checklist is best used in conjunction with this article (freely available on the Web sites of PLoS Medicine at <http://www.plosmedicine.org/>, Annals of Internal Medicine at <http://www.annals.org/>, and Epidemiology at <http://www.epidem.com/>). Information on the STROBE Initiative is available at [www.strobe-statement.org](http://www.strobe-statement.org).
