# Supplementary material for: Impact of a teaching hospital-based multidisciplinary telemedicine programme in Southwestern Colombia: a cross-sectional resource analysis
Source: PubMed Central journal article supplement — BMJ Open. 2024 May 1;14(5):e084447. doi: 10.1136/bmjopen-2024-084447 (PMC11086581; doi:10.1136/bmjopen-2024-084447), 2024-05-01
Supplement: bmjopen-2024-084447supp001.pdf [file bmjopen-2024-084447supp001.pdf]

**Supplementary Table 1.** Number of outpatient care provided per month according to modality of care, between April and December 2020.

| <b>Month</b> | <b>Telemedicine consultations</b> | <b>In-person consultations</b> |
|--------------|-----------------------------------|--------------------------------|
| April        | 4 181                             | 8 920                          |
| May          | 7 378                             | 13 674                         |
| June         | 7 770                             | 20 576                         |
| July         | 9 427                             | 25 897                         |
| August       | 8 117                             | 24 679                         |
| September    | 7 707                             | 33 305                         |
| October      | 6 521                             | 36 153                         |
| November     | 5 609                             | 36 094                         |
| December     | 5 548                             | 34 462                         |
| Total        | 62 258                            | 233 760                        |
